# Supplementary material for: Microbial Community Structure and Functional Potential of Deep-Sea Sediments on Low Activity Hydrothermal Area in the Central Indian Ridge
Source: Frontiers journal article supplement (doi:10.3389/fmars.2022.784807), 2022-02-17
Supplement: Table_2.XLSX [file Table_2.XLSX]

## Sheet: Table S2
Table S2. Information on publicly available metagenomes used for comparison in this study. The statistics shown here are based on the MG-RAST pipeline.
Sample ID	MG-RAST ID	Source	Location	Post QC reads	No. of predicted proteins	KO hits	SEED hits	Bacteria hits (%)	Archaea hits (%)	Reference
GTV1902	4.89849e+06	Sediment	CIR	17533939	6305326	3361093	3196910	85.57	13.28	This study
GTV1904	4.89848e+06	Sediment	CIR	15395496	6081369	3032296	3291587	97.16	1.72	This study
GTV1906	4.89848e+06	Sediment	CIR	16971386	5459878	2649023	2731295	93.79	4.83	This study
BaC	_	Chimney	SWIR	35647745	17097823	6840790	7521377	95.03	3.36	Lecoeuvre et al., 2021
Chan	_	Chimney	SWIR	34104436	17549637	5867833	6705864	97.09	1.28	Lecoeuvre et al., 2021
OCT	_	Chimney	SWIR	34794305	13307095	5104213	5210245	85.79	12.93	Lecoeuvre et al., 2021
PiMo	_	Chimney	SWIR	32981253	18732259	6747654	7526810	95.58	3.67	Lecoeuvre et al., 2021
ToMo	_	Chimney	SWIR	81590658	27750560	11015890	11461254	86.18	12.41	Lecoeuvre et al., 2021
RB35	4.71894e+06	Sediment	MAR	12720510	6529397	2717953	2741886	95.73	3.25	Cerqueira et al., 2018
MG35	4.71894e+06	Sediment	MAR	4550463	2723485	1159223	1285464	96.74	0.61	Cerqueira et al., 2018

## Sheet: Table S3
Table S3. The distribution and total number of hits of bacterial genera in the three metagenomes studied.
Phylum	Class	Order	Family	Genus	GTV1902	GTV1904	GTV1906
Proteobacteria	Deltaproteobacteria	Desulfuromonadales	Geobacteraceae	Geobacter	191857	124773	134174
Proteobacteria	Gammaproteobacteria	Chromatiales	Ectothiorhodospiraceae	Thioalkalivibrio	139237	185342	131155
Proteobacteria	Gammaproteobacteria	Pseudomonadales	Pseudomonadaceae	Pseudomonas	137552	179321	116639
Proteobacteria	Gammaproteobacteria	Chromatiales	Chromatiaceae	Nitrosococcus	130372	172435	103641
Proteobacteria	Gammaproteobacteria	unclassified (derived from Gammaproteobacteria)	unclassified (derived from Gammaproteobacteria)	unclassified (derived from Gammaproteobacteria)	118342	147087	91588
Proteobacteria	Gammaproteobacteria	Alteromonadales	Shewanellaceae	Shewanella	111446	143674	91210
Planctomycetes	Planctomycetacia	Planctomycetales	Planctomycetaceae	Planctomyces	84536	100146	83237
Proteobacteria	Alphaproteobacteria	Rhodobacterales	Rhodobacteraceae	Ruegeria	81657	86548	80619
Proteobacteria	Gammaproteobacteria	Vibrionales	Vibrionaceae	Vibrio	78927	83318	78106
Proteobacteria	Gammaproteobacteria	Methylococcales	Methylococcaceae	Methylococcus	77343	82480	77885
Proteobacteria	Alphaproteobacteria	Rhodobacterales	Rhodobacteraceae	Roseobacter	72439	77504	72803
Proteobacteria	Gammaproteobacteria	Methylococcales	Methylococcaceae	Methylobacter	70796	76050	70817
Proteobacteria	Betaproteobacteria	Burkholderiales	Burkholderiaceae	Burkholderia	70564	74023	70156
Bacteroidetes	Sphingobacteria	Sphingobacteriales	Rhodothermaceae	Rhodothermus	66036	71167	65374
Bacteroidetes	Flavobacteria	Flavobacteriales	Flavobacteriaceae	Flavobacterium	62195	70281	59391
Bacteroidetes	Bacteroidia	Bacteroidales	Bacteroidaceae	Bacteroides	60487	68823	58918
Bacteroidetes	Flavobacteria	Flavobacteriales	Flavobacteriaceae	Gramella	59544	67595	58636
Proteobacteria	Gammaproteobacteria	Chromatiales	Chromatiaceae	Allochromatium	58339	67036	58204
Proteobacteria	Gammaproteobacteria	Chromatiales	Ectothiorhodospiraceae	Alkalilimnicola	57865	66672	55169
Proteobacteria	Gammaproteobacteria	Alteromonadales	Alteromonadaceae	Marinobacter	57379	66499	52923
Planctomycetes	Planctomycetacia	Planctomycetales	Planctomycetaceae	Rhodopirellula	52081	66124	52111
Bacteroidetes	Sphingobacteria	Sphingobacteriales	Rhodothermaceae	Salinibacter	51367	63256	50570
Chloroflexi	Chloroflexi (class)	Chloroflexales	Chloroflexaceae	Roseiflexus	51164	60979	48271
Firmicutes	Clostridia	Clostridiales	Clostridiaceae	Clostridium	50892	59830	46606
Firmicutes	Bacilli	Bacillales	Bacillaceae	Bacillus	50301	56492	44752
Proteobacteria	Deltaproteobacteria	Desulfuromonadales	Pelobacteraceae	Pelobacter	49148	56041	44644
Proteobacteria	Deltaproteobacteria	Desulfovibrionales	Desulfovibrionaceae	Desulfovibrio	47743	55687	44576
Proteobacteria	Gammaproteobacteria	Alteromonadales	Pseudoalteromonadaceae	Pseudoalteromonas	47586	53530	43731
Proteobacteria	Alphaproteobacteria	Rhodobacterales	Rhodobacteraceae	Rhodobacter	47232	53014	43707
Proteobacteria	Betaproteobacteria	Burkholderiales	Burkholderiaceae	Ralstonia	46763	52855	43681
Proteobacteria	Betaproteobacteria	Hydrogenophilales	Hydrogenophilaceae	Thiobacillus	46648	51172	43318
Bacteroidetes	Flavobacteria	Flavobacteriales	Flavobacteriaceae	Maribacter	46392	50648	43160
Acidobacteria	Solibacteres	Solibacterales	Solibacteraceae	Candidatus Solibacter	45138	50034	41177
Proteobacteria	Alphaproteobacteria	Rhizobiales	Bradyrhizobiaceae	Rhodopseudomonas	44681	49948	39531
Proteobacteria	Gammaproteobacteria	Oceanospirillales	Hahellaceae	Hahella	43085	49530	39401
Actinobacteria	Actinobacteria (class)	Actinomycetales	Streptomycetaceae	Streptomyces	42951	48839	39067
Planctomycetes	Planctomycetacia	Planctomycetales	Planctomycetaceae	Blastopirellula	41605	48095	38320
Bacteroidetes	Flavobacteria	Flavobacteriales	unclassified (derived from Flavobacteriales)	unclassified (derived from Flavobacteriales)	41266	47881	37232
Planctomycetes	Planctomycetacia	Planctomycetales	Planctomycetaceae	Pirellula	41055	47536	37230
Proteobacteria	Gammaproteobacteria	Oceanospirillales	Alcanivoracaceae	Alcanivorax	40771	44914	35068
Bacteroidetes	Cytophagia	Cytophagales	Cytophagaceae	Cytophaga	40518	44847	34507
Proteobacteria	Betaproteobacteria	Nitrosomonadales	Nitrosomonadaceae	Nitrosomonas	38913	44793	34101
Proteobacteria	Deltaproteobacteria	Myxococcales	Myxococcaceae	Anaeromyxobacter	38168	44681	34087
Bacteroidetes	Cytophagia	Cytophagales	Flammeovirgaceae	Marivirga	37764	44116	34034
Proteobacteria	Alphaproteobacteria	Rhizobiales	Bradyrhizobiaceae	Bradyrhizobium	37328	44073	33573
Proteobacteria	Betaproteobacteria	Burkholderiales	Burkholderiaceae	Cupriavidus	36630	43955	32796
Chlorobi	Chlorobia	Chlorobiales	Chlorobiaceae	Chlorobium	36510	43760	31853
Actinobacteria	Actinobacteria (class)	Actinomycetales	Mycobacteriaceae	Mycobacterium	36499	42964	31504
Proteobacteria	Gammaproteobacteria	Thiotrichales	Thiotrichaceae	Beggiatoa	35644	42224	30973
Proteobacteria	Gammaproteobacteria	Thiotrichales	Piscirickettsiaceae	Methylophaga	35623	42070	30508
Proteobacteria	Gammaproteobacteria	Xanthomonadales	Xanthomonadaceae	Xanthomonas	35286	42002	30423
Proteobacteria	Gammaproteobacteria	unclassified (derived from Gammaproteobacteria)	unclassified (derived from Gammaproteobacteria)	Endoriftia	35061	39849	29967
Proteobacteria	Alphaproteobacteria	Rhodospirillales	Rhodospirillaceae	Magnetospirillum	35047	39579	29580
Proteobacteria	Gammaproteobacteria	Thiotrichales	Piscirickettsiaceae	Thiomicrospira	33820	38386	28909
Proteobacteria	Gammaproteobacteria	Alteromonadales	Alteromonadaceae	Saccharophagus	33133	37506	28873
Proteobacteria	Alphaproteobacteria	Rhodospirillales	Rhodospirillaceae	Rhodospirillum	33110	37455	28437
Bacteroidetes	Flavobacteria	Flavobacteriales	Flavobacteriaceae	Polaribacter	32584	36680	28289
Bacteroidetes	Sphingobacteria	Sphingobacteriales	Sphingobacteriaceae	Pedobacter	31761	36323	27931
Proteobacteria	Gammaproteobacteria	Legionellales	Legionellaceae	Legionella	30187	35894	27755
Cyanobacteria	unclassified (derived from Cyanobacteria)	Chroococcales	unclassified (derived from Chroococcales)	Cyanothece	30085	35278	27533
Proteobacteria	Alphaproteobacteria	Rhizobiales	Rhizobiaceae	Sinorhizobium	29847	35084	27245
Proteobacteria	Gammaproteobacteria	Alteromonadales	Colwelliaceae	Colwellia	29190	34809	27107
Cyanobacteria	unclassified (derived from Cyanobacteria)	Chroococcales	unclassified (derived from Chroococcales)	Synechococcus	28609	34665	27105
Proteobacteria	Gammaproteobacteria	Chromatiales	Ectothiorhodospiraceae	Halorhodospira	28213	33713	26918
Proteobacteria	Deltaproteobacteria	unclassified (derived from Deltaproteobacteria)	unclassified (derived from Deltaproteobacteria)	unclassified (derived from Deltaproteobacteria)	27681	33436	26586
Proteobacteria	Deltaproteobacteria	Myxococcales	Haliangiaceae	Haliangium	27546	33217	25949
Proteobacteria	Gammaproteobacteria	Vibrionales	Vibrionaceae	Photobacterium	27531	33036	25764
Bacteroidetes	Cytophagia	Cytophagales	Cytophagaceae	Spirosoma	27150	33021	25624
Chloroflexi	Chloroflexi (class)	Chloroflexales	Chloroflexaceae	Chloroflexus	26945	31974	25282
Proteobacteria	Gammaproteobacteria	unclassified (derived from Gammaproteobacteria)	unclassified (derived from Gammaproteobacteria)	Congregibacter	26592	31655	25101
Proteobacteria	Gammaproteobacteria	Chromatiales	Ectothiorhodospiraceae	Nitrococcus	26227	31465	24965
Proteobacteria	Gammaproteobacteria	Oceanospirillales	Oceanospirillaceae	Marinomonas	25088	31326	24909
Proteobacteria	Alphaproteobacteria	Rhizobiales	Methylobacteriaceae	Methylobacterium	24391	31197	24847
Proteobacteria	Deltaproteobacteria	Myxococcales	Myxococcaceae	Myxococcus	24057	30752	24379
Proteobacteria	Alphaproteobacteria	Rhodobacterales	Rhodobacteraceae	Roseovarius	23510	30751	24317
Proteobacteria	unclassified (derived from Proteobacteria)	unclassified (derived from Proteobacteria)	unclassified (derived from Proteobacteria)	Magnetococcus	23244	30375	23565
Proteobacteria	Alphaproteobacteria	Rhizobiales	Phyllobacteriaceae	Mesorhizobium	22800	29800	23080
Bacteroidetes	Cytophagia	Cytophagales	Cytophagaceae	Microscilla	22580	29726	22346
Actinobacteria	Actinobacteria (class)	Actinomycetales	Frankiaceae	Frankia	22456	29708	22067
Proteobacteria	Epsilonproteobacteria	Campylobacterales	Helicobacteraceae	Sulfurimonas	21449	29608	21788
Bacteroidetes	Flavobacteria	Flavobacteriales	Flavobacteriaceae	Croceibacter	21411	29067	21748
Proteobacteria	Alphaproteobacteria	Rhizobiales	Phyllobacteriaceae	Parvibaculum	21336	28609	21696
Bacteroidetes	Cytophagia	Cytophagales	Cyclobacteriaceae	Algoriphagus	21327	28530	21522
Bacteroidetes	Flavobacteria	Flavobacteriales	Flavobacteriaceae	Robiginitalea	20609	27946	21309
Proteobacteria	Alphaproteobacteria	Rhizobiales	Rhizobiaceae	Rhizobium	20508	27913	21273
Proteobacteria	Deltaproteobacteria	Desulfuromonadales	Desulfuromonadaceae	Desulfuromonas	19938	27024	21201
Proteobacteria	Deltaproteobacteria	Desulfobacterales	Desulfobulbaceae	Desulfotalea	19612	26170	20967
Proteobacteria	Deltaproteobacteria	Syntrophobacterales	Syntrophobacteraceae	Syntrophobacter	19459	26115	20920
Proteobacteria	Alphaproteobacteria	Rhodobacterales	Rhodobacteraceae	Jannaschia	19315	26100	20827
Bacteroidetes	Cytophagia	Cytophagales	Cytophagaceae	Dyadobacter	19024	25921	20712
Acidobacteria	unclassified (derived from Acidobacteria)	unclassified (derived from Acidobacteria)	unclassified (derived from Acidobacteria)	Candidatus Koribacter	18994	25851	20657
Proteobacteria	Gammaproteobacteria	Oceanospirillales	Alcanivoracaceae	Kangiella	18869	25578	20651
Bacteroidetes	Sphingobacteria	Sphingobacteriales	unclassified (derived from Sphingobacteriales)	Chitinophaga	18680	24659	20532
Bacteroidetes	Flavobacteria	Flavobacteriales	Flavobacteriaceae	Zunongwangia	18653	24503	20496
Proteobacteria	Gammaproteobacteria	Alteromonadales	Psychromonadaceae	Psychromonas	18619	24181	20474
Proteobacteria	Betaproteobacteria	Rhodocyclales	Rhodocyclaceae	Dechloromonas	18543	24142	20027
Proteobacteria	Alphaproteobacteria	Rhodobacterales	Rhodobacteraceae	Dinoroseobacter	18294	24138	20002
Proteobacteria	Epsilonproteobacteria	unclassified (derived from Epsilonproteobacteria)	unclassified (derived from Epsilonproteobacteria)	Sulfurovum	18139	24022	19908
Proteobacteria	Betaproteobacteria	Gallionellales	Gallionellaceae	Sideroxydans	17719	23698	19777
Proteobacteria	Gammaproteobacteria	Pseudomonadales	Moraxellaceae	Acinetobacter	17622	23497	19715
Proteobacteria	Betaproteobacteria	Nitrosomonadales	Nitrosomonadaceae	Nitrosospira	17547	22908	19305
Proteobacteria	Alphaproteobacteria	Caulobacterales	Caulobacteraceae	Caulobacter	17375	22507	19273
Proteobacteria	Gammaproteobacteria	Alteromonadales	Idiomarinaceae	Idiomarina	17093	22292	19260
Proteobacteria	Deltaproteobacteria	Desulfobacterales	Desulfobacteraceae	Desulfatibacillum	16958	22268	19249
Proteobacteria	Betaproteobacteria	Burkholderiales	Alcaligenaceae	Bordetella	16915	22256	18870
Proteobacteria	Deltaproteobacteria	Desulfobacterales	Desulfobacteraceae	Desulfobacterium	16827	22194	18855
Proteobacteria	Betaproteobacteria	Methylophilales	Methylophilaceae	Methylobacillus	16627	22041	18583
Bacteroidetes	Bacteroidia	Bacteroidales	Prevotellaceae	Prevotella	16601	21807	18563
Proteobacteria	Gammaproteobacteria	Oceanospirillales	Oceanospirillaceae	Neptuniibacter	16356	21680	18255
Proteobacteria	Betaproteobacteria	Rhodocyclales	Rhodocyclaceae	Aromatoleum	16257	21656	18051
Proteobacteria	Gammaproteobacteria	Pseudomonadales	Pseudomonadaceae	Cellvibrio	16170	21325	17963
Proteobacteria	Deltaproteobacteria	Myxococcales	Polyangiaceae	Sorangium	16131	21202	17930
Bacteroidetes	Flavobacteria	unclassified (derived from Flavobacteria)	unclassified (derived from Flavobacteria)	unclassified (derived from Flavobacteria)	16109	21128	17915
Bacteroidetes	Flavobacteria	Flavobacteriales	Flavobacteriaceae	Leeuwenhoekiella	15909	20971	17646
Proteobacteria	Alphaproteobacteria	unclassified (derived from Alphaproteobacteria)	unclassified (derived from Alphaproteobacteria)	unclassified (derived from Alphaproteobacteria)	15908	20967	17628
Gemmatimonadetes	Gemmatimonadetes (class)	Gemmatimonadales	Gemmatimonadaceae	Gemmatimonas	15856	20647	17622
Bacteroidetes	Flavobacteria	Flavobacteriales	Flavobacteriaceae	Kordia	15621	20581	17543
Proteobacteria	Gammaproteobacteria	Oceanospirillales	Halomonadaceae	Chromohalobacter	15543	20270	17428
Proteobacteria	Zetaproteobacteria	Mariprofundales	Mariprofundaceae	Mariprofundus	15444	20265	17233
Proteobacteria	Betaproteobacteria	Burkholderiales	Comamonadaceae	Polaromonas	15347	20157	17041
Proteobacteria	Betaproteobacteria	Burkholderiales	Comamonadaceae	Acidovorax	15265	19772	16948
Proteobacteria	Gammaproteobacteria	Aeromonadales	Aeromonadaceae	Aeromonas	15211	19755	16809
Cyanobacteria	unclassified (derived from Cyanobacteria)	Nostocales	Nostocaceae	Nostoc	15032	19637	16770
Proteobacteria	Alphaproteobacteria	Rhodobacterales	Rhodobacteraceae	Labrenzia	15009	19587	16703
Chloroflexi	Chloroflexi (class)	Herpetosiphonales	Herpetosiphonaceae	Herpetosiphon	15003	19316	16665
Bacteroidetes	Flavobacteria	Flavobacteriales	Flavobacteriaceae	Dokdonia	14746	19233	16602
Proteobacteria	Betaproteobacteria	Rhodocyclales	Rhodocyclaceae	Azoarcus	14683	19224	16510
Proteobacteria	Deltaproteobacteria	Syntrophobacterales	Syntrophaceae	Syntrophus	14601	19135	16412
Proteobacteria	Deltaproteobacteria	Desulfobacterales	Desulfobacteraceae	Desulfococcus	14539	19125	16257
Proteobacteria	Gammaproteobacteria	Alteromonadales	unclassified (derived from Alteromonadales)	Teredinibacter	14521	18947	16248
Chlorobi	Chlorobia	Chlorobiales	Chlorobiaceae	Chloroherpeton	14515	18649	16187
Proteobacteria	Gammaproteobacteria	Chromatiales	Halothiobacillaceae	Halothiobacillus	14453	18639	15815
Proteobacteria	Alphaproteobacteria	Rhodobacterales	Rhodobacteraceae	unclassified (derived from Rhodobacteraceae)	14438	18534	15751
Proteobacteria	Deltaproteobacteria	Desulfobacterales	Desulfobulbaceae	Desulfurivibrio	14297	18413	15555
Proteobacteria	Gammaproteobacteria	Acidithiobacillales	Acidithiobacillaceae	Acidithiobacillus	14152	18190	15543
Proteobacteria	Alphaproteobacteria	Rhizobiales	Rhizobiaceae	Agrobacterium	14002	18003	15251
Proteobacteria	Deltaproteobacteria	Myxococcales	Nannocystaceae	Plesiocystis	13879	17539	14913
Proteobacteria	Alphaproteobacteria	Rhodobacterales	Hyphomonadaceae	Maricaulis	13768	17403	14702
Proteobacteria	Gammaproteobacteria	Alteromonadales	Alteromonadaceae	Alteromonas	13734	17272	14700
Chloroflexi	Thermomicrobia (class)	Sphaerobacterales	Sphaerobacteraceae	Sphaerobacter	13609	17194	14598
Firmicutes	Bacilli	Bacillales	Bacillaceae	Geobacillus	13544	17155	14285
Bacteroidetes	Bacteroidia	Bacteroidales	Porphyromonadaceae	Parabacteroides	13339	17026	14202
Proteobacteria	Alphaproteobacteria	Rhizobiales	Bradyrhizobiaceae	Nitrobacter	13065	16954	14102
Proteobacteria	Alphaproteobacteria	Rhodobacterales	Rhodobacteraceae	Oceanicola	12976	16803	14023
Proteobacteria	Deltaproteobacteria	Myxococcales	Cystobacteraceae	Stigmatella	12828	16681	13796
Proteobacteria	Alphaproteobacteria	Rhodobacterales	Rhodobacteraceae	Paracoccus	12804	16435	13737
Actinobacteria	Actinobacteria (class)	Actinomycetales	Nocardiaceae	Rhodococcus	12794	16426	13610
Proteobacteria	Betaproteobacteria	unclassified (derived from Betaproteobacteria)	unclassified (derived from Betaproteobacteria)	Candidatus Accumulibacter	12726	16319	13590
Proteobacteria	Alphaproteobacteria	Rhodospirillales	Rhodospirillaceae	Azospirillum	12539	16115	13580
Proteobacteria	Gammaproteobacteria	Legionellales	Coxiellaceae	Coxiella	12390	16050	13461
Actinobacteria	Actinobacteria (class)	Rubrobacterales	Rubrobacteraceae	Rubrobacter	12231	16035	13332
Proteobacteria	Betaproteobacteria	Methylophilales	Methylophilaceae	Methylotenera	12209	15681	13324
Chlorobi	Chlorobia	Chlorobiales	Chlorobiaceae	Chlorobaculum	12194	15619	13320
Firmicutes	Bacilli	Bacillales	Paenibacillaceae	Paenibacillus	11962	15577	13309
Proteobacteria	Gammaproteobacteria	Enterobacteriales	Enterobacteriaceae	Yersinia	11960	15509	13306
Verrucomicrobia	Verrucomicrobiae	Verrucomicrobiales	Verrucomicrobia subdivision 3	unclassified (derived from Verrucomicrobia subdivision 3)	11823	15467	13146
Proteobacteria	Epsilonproteobacteria	Campylobacterales	unclassified (derived from Campylobacterales)	unclassified (derived from Campylobacterales)	11750	15459	12949
Planctomycetes	Planctomycetacia	Planctomycetales	Planctomycetaceae	Gemmata	11703	15262	12919
Proteobacteria	Betaproteobacteria	Burkholderiales	Comamonadaceae	Albidiferax	11636	15249	12809
Deinococcus-Thermus	Deinococci	Deinococcales	Deinococcaceae	Deinococcus	11513	14924	12515
Proteobacteria	Alphaproteobacteria	Rhizobiales	Phyllobacteriaceae	Chelativorans	11314	14802	12368
Proteobacteria	Alphaproteobacteria	Rhodobacterales	Hyphomonadaceae	Hyphomonas	11107	14737	12101
Verrucomicrobia	Spartobacteria	unclassified (derived from Spartobacteria)	unclassified (derived from Spartobacteria)	Chthoniobacter	11008	14710	12066
Proteobacteria	Gammaproteobacteria	Xanthomonadales	Xanthomonadaceae	Stenotrophomonas	10972	14710	12035
Proteobacteria	Alphaproteobacteria	Rhizobiales	Xanthobacteraceae	Xanthobacter	10902	14516	11974
Nitrospirae	Nitrospira (class)	Nitrospirales	Nitrospiraceae	Nitrospira	10816	14434	11706
Proteobacteria	Alphaproteobacteria	Sphingomonadales	Erythrobacteraceae	Erythrobacter	10744	14325	11685
Proteobacteria	Betaproteobacteria	Neisseriales	Neisseriaceae	Chromobacterium	10506	14316	11684
Spirochaetes	Spirochaetes (class)	Spirochaetales	Leptospiraceae	Leptospira	10402	14219	11651
Verrucomicrobia	Opitutae	unclassified (derived from Opitutae)	Opitutaceae	Opitutus	10395	14112	11486
Proteobacteria	Alphaproteobacteria	Sphingomonadales	Sphingomonadaceae	Sphingomonas	10271	13955	11453
Proteobacteria	Alphaproteobacteria	Rhodobacterales	Rhodobacteraceae	Maritimibacter	10259	13755	11418
Spirochaetes	Spirochaetes (class)	Spirochaetales	Spirochaetaceae	Spirochaeta	10253	13735	11397
Proteobacteria	Alphaproteobacteria	Rhodobacterales	unclassified (derived from Rhodobacterales)	unclassified (derived from Rhodobacterales)	10051	13730	11385
Proteobacteria	Gammaproteobacteria	unclassified (derived from Gammaproteobacteria)	unclassified (derived from Gammaproteobacteria)	Reinekea	10020	13656	11369
Firmicutes	Clostridia	Clostridiales	Peptococcaceae	Desulfotomaculum	9981	13604	11339
Proteobacteria	Betaproteobacteria	Neisseriales	Neisseriaceae	Neisseria	9927	13578	11212
Bacteroidetes	unclassified (derived from Bacteroidetes)	unclassified (derived from Bacteroidetes)	unclassified (derived from Bacteroidetes)	unclassified (derived from Bacteroidetes)	9840	13573	11190
Proteobacteria	Gammaproteobacteria	Vibrionales	Vibrionaceae	Aliivibrio	9756	13538	11156
Acidobacteria	Acidobacteria (class)	Acidobacteriales	Acidobacteriaceae	Acidobacterium	9715	13524	10997
Bacteroidetes	Bacteroidia	Bacteroidales	Porphyromonadaceae	Porphyromonas	9530	13409	10924
Bacteroidetes	Flavobacteria	Flavobacteriales	Flavobacteriaceae	Capnocytophaga	9435	13278	10913
Cyanobacteria	unclassified (derived from Cyanobacteria)	Nostocales	Nostocaceae	Anabaena	9410	13211	10832
Deinococcus-Thermus	Deinococci	Thermales	Thermaceae	Meiothermus	9396	13076	10782
Chlorobi	Chlorobia	Chlorobiales	Chlorobiaceae	Pelodictyon	9224	12971	10776
Proteobacteria	Alphaproteobacteria	Rhizobiales	Brucellaceae	Brucella	9196	12891	10623
Proteobacteria	Betaproteobacteria	Rhodocyclales	Rhodocyclaceae	Thauera	9196	12943	10637
Cyanobacteria	Gloeobacteria	Gloeobacterales	unclassified (derived from Gloeobacterales)	Gloeobacter	9156	12702	10574
Actinobacteria	Actinobacteria (class)	Actinomycetales	Corynebacteriaceae	Corynebacterium	9138	12702	10560
Firmicutes	Clostridia	Clostridiales	Clostridiales Family XVIII. Incertae Sedis	Symbiobacterium	9119	12668	10374
Chloroflexi	Ktedonobacteria	Ktedonobacterales	Ktedonobacteraceae	Ktedonobacter	9097	12664	10351
Proteobacteria	Gammaproteobacteria	Pseudomonadales	Moraxellaceae	Psychrobacter	9055	12627	10269
Proteobacteria	Gammaproteobacteria	Oceanospirillales	Oceanospirillaceae	Bermanella	9000	12562	10135
Proteobacteria	Gammaproteobacteria	Pseudomonadales	Pseudomonadaceae	Azotobacter	8826	12465	10030
Proteobacteria	Gammaproteobacteria	Enterobacteriales	Enterobacteriaceae	Escherichia	8689	12364	10001
Bacteroidetes	Cytophagia	Cytophagales	Cytophagaceae	Leadbetterella	8685	11882	9799
Bacteroidetes	Flavobacteria	Flavobacteriales	Flavobacteriaceae	Psychroflexus	8681	11842	9770
Proteobacteria	Epsilonproteobacteria	Campylobacterales	Campylobacteraceae	Campylobacter	8555	11573	9737
Deinococcus-Thermus	Deinococci	Thermales	Thermaceae	Thermus	8553	11544	9708
Firmicutes	Clostridia	Clostridiales	Clostridiaceae	Alkaliphilus	8547	11402	9642
Firmicutes	Clostridia	Clostridiales	Clostridiales Family XVII. Incertae Sedis	Thermaerobacter	8512	11391	9550
Actinobacteria	Actinobacteria (class)	Actinomycetales	Nocardioidaceae	Nocardioides	8315	11354	9506
Verrucomicrobia	Verrucomicrobiae	Verrucomicrobiales	unclassified (derived from Verrucomicrobiales)	unclassified (derived from Verrucomicrobiales)	8294	11289	9470
Proteobacteria	Betaproteobacteria	Gallionellales	Gallionellaceae	Gallionella	8168	11193	9354
Thermotogae	Thermotogae (class)	Thermotogales	Thermotogaceae	Thermotoga	8159	10999	9311
Proteobacteria	Epsilonproteobacteria	Campylobacterales	Campylobacteraceae	Arcobacter	8144	10922	9295
Actinobacteria	Actinobacteria (class)	Actinomycetales	Micromonosporaceae	Salinispora	8126	10875	9253
Proteobacteria	Gammaproteobacteria	Pasteurellales	Pasteurellaceae	Haemophilus	8125	10805	9153
Firmicutes	Clostridia	Clostridiales	Peptococcaceae	Desulfitobacterium	8064	10761	9121
Proteobacteria	Gammaproteobacteria	Alteromonadales	Ferrimonadaceae	Ferrimonas	8031	10751	9077
Proteobacteria	Betaproteobacteria	Methylophilales	Methylophilaceae	Methylovorus	7952	10682	9035
Proteobacteria	Deltaproteobacteria	Desulfovibrionales	Desulfomicrobiaceae	Desulfomicrobium	7871	10651	9026
Proteobacteria	Betaproteobacteria	Burkholderiales	unclassified (derived from Burkholderiales)	Methylibium	7840	10635	8953
Bacteroidetes	Bacteroidia	Bacteroidales	Porphyromonadaceae	Paludibacter	7836	10545	8944
Firmicutes	Bacilli	Lactobacillales	Lactobacillaceae	Lactobacillus	7744	10508	8892
Proteobacteria	Betaproteobacteria	Burkholderiales	Oxalobacteraceae	Herminiimonas	7741	10378	8825
Firmicutes	Clostridia	Thermoanaerobacterales	Thermoanaerobacteraceae	Moorella	7707	10313	8719
Proteobacteria	Betaproteobacteria	Burkholderiales	Oxalobacteraceae	Janthinobacterium	7643	10300	8657
Proteobacteria	Gammaproteobacteria	Oceanospirillales	Halomonadaceae	Halomonas	7637	10222	8633
Proteobacteria	Alphaproteobacteria	Rhodospirillales	Acetobacteraceae	Acidiphilium	7588	10164	8598
Cyanobacteria	unclassified (derived from Cyanobacteria)	unclassified (derived from Cyanobacteria)	unclassified (derived from Cyanobacteria)	Acaryochloris	7586	10152	8563
Proteobacteria	Gammaproteobacteria	Xanthomonadales	Xanthomonadaceae	Xylella	7419	10130	8519
Proteobacteria	Alphaproteobacteria	Rhizobiales	Hyphomicrobiaceae	Rhodomicrobium	7388	10088	8500
Proteobacteria	Alphaproteobacteria	Rhodobacterales	Rhodobacteraceae	Sulfitobacter	7305	10073	8499
Chloroflexi	Thermomicrobia (class)	Thermomicrobiales	Thermomicrobiaceae	Thermomicrobium	7301	10069	8470
Verrucomicrobia	Verrucomicrobiae	Verrucomicrobiales	Verrucomicrobiaceae	Verrucomicrobium	7257	9869	8335
Chloroflexi	Chloroflexi (class)	Chloroflexales	Oscillochloridaceae	Oscillochloris	7250	9822	8304
unclassified (derived from Bacteria)	unclassified (derived from Bacteria)	unclassified (derived from Bacteria)	unclassified (derived from Bacteria)	Thermobaculum	7241	9819	8290
Bacteroidetes	Sphingobacteria	Sphingobacteriales	Sphingobacteriaceae	Mucilaginibacter	7219	9797	8214
Cyanobacteria	unclassified (derived from Cyanobacteria)	Chroococcales	unclassified (derived from Chroococcales)	Synechocystis	7166	9769	8173
Deferribacteres	Deferribacteres (class)	Deferribacterales	Deferribacteraceae	Deferribacter	7155	9671	8139
Proteobacteria	Alphaproteobacteria	Parvularculales	Parvularculaceae	Parvularcula	7133	9628	8127
Bacteroidetes	Sphingobacteria	Sphingobacteriales	Sphingobacteriaceae	Sphingobacterium	7067	9576	8083
Proteobacteria	Alphaproteobacteria	Sphingomonadales	Sphingomonadaceae	Sphingopyxis	7000	9521	8036
Actinobacteria	Actinobacteria (class)	Actinomycetales	Pseudonocardiaceae	Saccharopolyspora	6901	9445	8033
Deferribacteres	Deferribacteres (class)	Deferribacterales	Deferribacteraceae	Denitrovibrio	6899	9287	8012
Firmicutes	Clostridia	Clostridiales	Peptococcaceae	Pelotomaculum	6881	9254	8002
Lentisphaerae	unclassified (derived from Lentisphaerae)	Lentisphaerales	Lentisphaeraceae	Lentisphaera	6873	9247	7848
Firmicutes	Clostridia	Thermoanaerobacterales	Thermoanaerobacteraceae	Caldanaerobacter	6856	9224	7813
Chloroflexi	Dehalococcoidetes	unclassified (derived from Dehalococcoidetes)	unclassified (derived from Dehalococcoidetes)	Dehalococcoides	6823	9163	7802
Proteobacteria	Alphaproteobacteria	Rhodobacterales	Rhodobacteraceae	Pseudovibrio	6796	9147	7789
Proteobacteria	Betaproteobacteria	Burkholderiales	Alcaligenaceae	Achromobacter	6766	9108	7780
Proteobacteria	Gammaproteobacteria	Pasteurellales	Pasteurellaceae	Actinobacillus	6756	9095	7727
Proteobacteria	Betaproteobacteria	Burkholderiales	Comamonadaceae	Verminephrobacter	6632	9004	7704
Proteobacteria	Alphaproteobacteria	Rhizobiales	Hyphomicrobiaceae	Hyphomicrobium	6627	8988	7674
Cyanobacteria	unclassified (derived from Cyanobacteria)	Oscillatoriales	unclassified (derived from Oscillatoriales)	Trichodesmium	6621	8943	7607
Proteobacteria	Deltaproteobacteria	Desulfarculales	Desulfarculaceae	Desulfarculus	6520	8913	7523
Proteobacteria	Alphaproteobacteria	Rhodobacterales	Rhodobacteraceae	Octadecabacter	6470	8864	7521
Proteobacteria	Alphaproteobacteria	Rhizobiales	Xanthobacteraceae	Azorhizobium	6438	8790	7486
Proteobacteria	Gammaproteobacteria	Thiotrichales	Francisellaceae	Francisella	6382	8759	7466
Firmicutes	Clostridia	Thermoanaerobacterales	Thermoanaerobacterales Family III. Incertae Sedis	Caldicellulosiruptor	6348	8688	7432
Proteobacteria	Alphaproteobacteria	Rhizobiales	Aurantimonadaceae	Aurantimonas	6344	8663	7365
Proteobacteria	Alphaproteobacteria	Rhizobiales	Brucellaceae	Ochrobactrum	6341	8633	7348
Firmicutes	Clostridia	Thermoanaerobacterales	Thermoanaerobacteraceae	Carboxydothermus	6318	8602	7245
Proteobacteria	Gammaproteobacteria	Alteromonadales	Moritellaceae	Moritella	6197	8590	7207
Verrucomicrobia	Opitutae	Puniceicoccales	Puniceicoccaceae	Coraliomargarita	6192	8554	7183
Proteobacteria	Gammaproteobacteria	Enterobacteriales	Enterobacteriaceae	Pectobacterium	6189	8548	7169
Proteobacteria	Gammaproteobacteria	Enterobacteriales	Enterobacteriaceae	Photorhabdus	6188	8461	7063
Actinobacteria	Actinobacteria (class)	Solirubrobacterales	Conexibacteraceae	Conexibacter	6177	8152	7021
Proteobacteria	Deltaproteobacteria	Bdellovibrionales	Bdellovibrionaceae	Bdellovibrio	6177	8364	7041
Actinobacteria	Actinobacteria (class)	Actinomycetales	Micrococcaceae	Arthrobacter	6108	8004	7008
Cyanobacteria	unclassified (derived from Cyanobacteria)	Prochlorales	Prochlorococcaceae	Prochlorococcus	6045	7862	6973
Deinococcus-Thermus	Deinococci	Deinococcales	Trueperaceae	Truepera	5940	7837	6961
Proteobacteria	Betaproteobacteria	Burkholderiales	unclassified (derived from Burkholderiales)	Thiomonas	5937	7799	6955
Proteobacteria	Alphaproteobacteria	Rhodobacterales	Rhodobacteraceae	Loktanella	5931	7724	6930
Firmicutes	Bacilli	Lactobacillales	Streptococcaceae	Streptococcus	5923	7678	6929
Proteobacteria	Gammaproteobacteria	Enterobacteriales	Enterobacteriaceae	Serratia	5883	7593	6893
Proteobacteria	Alphaproteobacteria	Rhodobacterales	Hyphomonadaceae	Oceanicaulis	5879	7461	6794
Proteobacteria	Alphaproteobacteria	Caulobacterales	Caulobacteraceae	Phenylobacterium	5852	7374	6591
Proteobacteria	Alphaproteobacteria	unclassified (derived from Alphaproteobacteria)	unclassified (derived from Alphaproteobacteria)	Candidatus Puniceispirillum	5843	7353	6586
Proteobacteria	Betaproteobacteria	Burkholderiales	unclassified (derived from Burkholderiales)	Leptothrix	5830	7279	6586
Thermotogae	Thermotogae (class)	Thermotogales	Thermotogaceae	Thermosipho	5804	7258	6581
Proteobacteria	Betaproteobacteria	Neisseriales	Neisseriaceae	Lutiella	5769	7253	6491
Actinobacteria	Actinobacteria (class)	Acidimicrobiales	Acidimicrobiaceae	Acidimicrobium	5726	7236	6456
Proteobacteria	Alphaproteobacteria	Rhizobiales	Phyllobacteriaceae	Hoeflea	5675	7147	6405
Proteobacteria	Alphaproteobacteria	Rhizobiales	Xanthobacteraceae	Starkeya	5599	7079	6384
Firmicutes	Clostridia	Thermoanaerobacterales	Thermoanaerobacteraceae	Thermoanaerobacter	5588	7051	6296
Proteobacteria	Gammaproteobacteria	Enterobacteriales	Enterobacteriaceae	Salmonella	5570	7001	6229
Proteobacteria	Alphaproteobacteria	Sphingomonadales	Sphingomonadaceae	Novosphingobium	5549	6986	6192
Actinobacteria	Actinobacteria (class)	Actinomycetales	Acidothermaceae	Acidothermus	5502	6902	6184
Proteobacteria	Alphaproteobacteria	Rhodobacterales	Rhodobacteraceae	Roseibium	5463	6889	6181
Deinococcus-Thermus	Deinococci	Thermales	Thermaceae	Oceanithermus	5429	6883	6178
Proteobacteria	Betaproteobacteria	Burkholderiales	Burkholderiaceae	Polynucleobacter	5399	6855	6139
Proteobacteria	Epsilonproteobacteria	Campylobacterales	Helicobacteraceae	Helicobacter	5375	6798	6116
Spirochaetes	Spirochaetes (class)	Spirochaetales	Spirochaetaceae	Treponema	5367	6796	6115
Proteobacteria	Alphaproteobacteria	Rhodobacterales	Rhodobacteraceae	Ahrensia	5240	6784	6051
Proteobacteria	Betaproteobacteria	Neisseriales	Neisseriaceae	Laribacter	5239	6773	5980
Proteobacteria	Gammaproteobacteria	Aeromonadales	Aeromonadaceae	Tolumonas	5189	6771	5969
Firmicutes	Bacilli	Bacillales	Staphylococcaceae	Staphylococcus	5184	6732	5937
Actinobacteria	Actinobacteria (class)	Actinomycetales	Streptosporangiaceae	Streptosporangium	5163	6728	5861
Proteobacteria	Gammaproteobacteria	Enterobacteriales	Enterobacteriaceae	Dickeya	5158	6630	5822
Cyanobacteria	unclassified (derived from Cyanobacteria)	Oscillatoriales	unclassified (derived from Oscillatoriales)	Microcoleus	5142	6582	5743
Aquificae	Aquificae (class)	Aquificales	Aquificaceae	Aquifex	5138	6557	5741
Actinobacteria	Actinobacteria (class)	Actinomycetales	Nocardiopsaceae	Thermobifida	5119	6540	5724
Chrysiogenetes	Chrysiogenetes (class)	Chrysiogenales	Chrysiogenaceae	Desulfurispirillum	5092	6537	5705
Proteobacteria	Deltaproteobacteria	Desulfovibrionales	Desulfohalobiaceae	Desulfohalobium	5069	6487	5699
Fusobacteria	Fusobacteria (class)	Fusobacteriales	Fusobacteriaceae	Fusobacterium	4963	6401	5683
Deferribacteres	Deferribacteres (class)	Deferribacterales	Deferribacteraceae	Calditerrivibrio	4934	6364	5672
Firmicutes	Clostridia	Clostridiales	Eubacteriaceae	Eubacterium	4918	6250	5628
Proteobacteria	Alphaproteobacteria	Sphingomonadales	Sphingomonadaceae	Sphingobium	4907	6241	5624
Proteobacteria	Epsilonproteobacteria	unclassified (derived from Epsilonproteobacteria)	unclassified (derived from Epsilonproteobacteria)	Nitratiruptor	4898	6234	5558
Proteobacteria	Alphaproteobacteria	Rhizobiales	Beijerinckiaceae	Methylocella	4883	6178	5555
Proteobacteria	Epsilonproteobacteria	Campylobacterales	Helicobacteraceae	Sulfuricurvum	4871	6102	5522
Proteobacteria	Alphaproteobacteria	Rhodospirillales	Acetobacteraceae	Granulibacter	4851	6050	5488
Proteobacteria	Alphaproteobacteria	Rickettsiales	unclassified (derived from Rickettsiales)	Candidatus Pelagibacter	4806	6031	5471
Bacteroidetes	unclassified (derived from Bacteroidetes)	unclassified (derived from Bacteroidetes)	unclassified (derived from Bacteroidetes)	Candidatus Amoebophilus	4783	5997	5467
Proteobacteria	Alphaproteobacteria	Rhizobiales	Bradyrhizobiaceae	Oligotropha	4765	5940	5456
Proteobacteria	Gammaproteobacteria	Enterobacteriales	Enterobacteriaceae	Pantoea	4757	5883	5417
Proteobacteria	Gammaproteobacteria	Vibrionales	Vibrionaceae	unclassified (derived from Vibrionaceae)	4727	5866	5412
Proteobacteria	Gammaproteobacteria	Enterobacteriales	Enterobacteriaceae	Enterobacter	4679	5860	5397
Proteobacteria	Gammaproteobacteria	Alteromonadales	unclassified (derived from Alteromonadales)	unclassified (derived from Alteromonadales)	4651	5813	5363
Firmicutes	Clostridia	Clostridiales	Syntrophomonadaceae	Syntrophomonas	4561	5811	5334
Firmicutes	Clostridia	Halanaerobiales	Halanaerobiaceae	Halothermothrix	4550	5651	5316
Actinobacteria	Actinobacteria (class)	Actinomycetales	Micromonosporaceae	Micromonospora	4483	5613	5278
Proteobacteria	Alphaproteobacteria	Rhodobacterales	Rhodobacteraceae	Pelagibaca	4467	5606	5186
Actinobacteria	Actinobacteria (class)	Actinomycetales	Thermomonosporaceae	Thermomonospora	4458	5584	5167
Firmicutes	Bacilli	Bacillales	Alicyclobacillaceae	unclassified (derived from Alicyclobacillaceae)	4446	5562	5165
Proteobacteria	Gammaproteobacteria	Enterobacteriales	Enterobacteriaceae	Proteus	4445	5550	5157
Bacteroidetes	Flavobacteria	Flavobacteriales	Flavobacteriaceae	unclassified (derived from Flavobacteriaceae)	4409	5538	5154
Firmicutes	Clostridia	Clostridiales	Heliobacteriaceae	Heliobacterium	4401	5530	5144
Proteobacteria	Alphaproteobacteria	Rhodobacterales	Rhodobacteraceae	Citreicella	4354	5507	5142
Proteobacteria	Alphaproteobacteria	Rhodobacterales	Hyphomonadaceae	Hirschia	4347	5493	5113
Proteobacteria	Deltaproteobacteria	Desulfovibrionales	Desulfohalobiaceae	Desulfonatronospira	4346	5464	5088
Dictyoglomi	Dictyoglomia	Dictyoglomales	Dictyoglomaceae	Dictyoglomus	4319	5417	5035
Proteobacteria	Alphaproteobacteria	Rhodospirillales	Acetobacteraceae	Gluconacetobacter	4313	5372	4984
Proteobacteria	Alphaproteobacteria	Caulobacterales	Caulobacteraceae	Brevundimonas	4270	5340	4904
Proteobacteria	Alphaproteobacteria	Rhodobacterales	Rhodobacteraceae	Sagittula	4265	5284	4902
Proteobacteria	Betaproteobacteria	Burkholderiales	Comamonadaceae	Delftia	4255	5274	4897
Proteobacteria	Gammaproteobacteria	Enterobacteriales	Enterobacteriaceae	Klebsiella	4237	5253	4883
Proteobacteria	Gammaproteobacteria	Enterobacteriales	Enterobacteriaceae	Providencia	4204	5231	4881
Firmicutes	Clostridia	Clostridiales	Peptococcaceae	Candidatus Desulforudis	4179	5156	4878
Bacteroidetes	Flavobacteria	Flavobacteriales	Flavobacteriaceae	Chryseobacterium	4155	5155	4851
Actinobacteria	Actinobacteria (class)	Actinomycetales	Nocardiaceae	Nocardia	4102	5115	4846
Proteobacteria	Betaproteobacteria	Burkholderiales	Comamonadaceae	Variovorax	4064	5108	4835
Nitrospirae	Nitrospira (class)	Nitrospirales	Nitrospiraceae	Thermodesulfovibrio	4012	5085	4784
Candidatus Poribacteria	unclassified (derived from Candidatus Poribacteria)	unclassified (derived from Candidatus Poribacteria)	unclassified (derived from Candidatus Poribacteria)	unclassified (derived from Candidatus Poribacteria)	3967	5044	4779
Cyanobacteria	unclassified (derived from Cyanobacteria)	Chroococcales	unclassified (derived from Chroococcales)	Microcystis	3905	5033	4692
Aquificae	Aquificae (class)	Aquificales	Hydrogenothermaceae	Sulfurihydrogenibium	3903	5032	4665
Proteobacteria	Alphaproteobacteria	Rhodobacterales	Rhodobacteraceae	Phaeobacter	3876	5029	4657
Proteobacteria	Alphaproteobacteria	Rhodobacterales	Rhodobacteraceae	Oceanibulbus	3844	5025	4643
Chlamydiae	Chlamydiae (class)	Chlamydiales	Parachlamydiaceae	Candidatus Protochlamydia	3828	5012	4622
Proteobacteria	Gammaproteobacteria	Enterobacteriales	Enterobacteriaceae	Edwardsiella	3794	4984	4618
Cyanobacteria	unclassified (derived from Cyanobacteria)	Oscillatoriales	unclassified (derived from Oscillatoriales)	Lyngbya	3790	4971	4585
Cyanobacteria	unclassified (derived from Cyanobacteria)	Oscillatoriales	unclassified (derived from Oscillatoriales)	Arthrospira	3770	4945	4547
Proteobacteria	Betaproteobacteria	Burkholderiales	Oxalobacteraceae	Herbaspirillum	3737	4920	4541
Actinobacteria	Actinobacteria (class)	Actinomycetales	Catenulisporaceae	Catenulispora	3705	4868	4461
Firmicutes	Bacilli	Bacillales	Alicyclobacillaceae	Alicyclobacillus	3696	4825	4454
Proteobacteria	Alphaproteobacteria	Rhodobacterales	Rhodobacteraceae	Thalassobium	3693	4804	4437
Proteobacteria	Alphaproteobacteria	Rhizobiales	Bartonellaceae	Bartonella	3678	4796	4419
Cyanobacteria	unclassified (derived from Cyanobacteria)	Chroococcales	unclassified (derived from Chroococcales)	Thermosynechococcus	3638	4764	4325
Proteobacteria	Alphaproteobacteria	Rhodospirillales	Acetobacteraceae	Roseomonas	3610	4747	4325
Firmicutes	Clostridia	Clostridiales	Peptococcaceae	Thermincola	3609	4724	4260
Proteobacteria	Gammaproteobacteria	Pasteurellales	Pasteurellaceae	Pasteurella	3600	4686	4243
Actinobacteria	Actinobacteria (class)	Actinomycetales	Geodermatophilaceae	Geodermatophilus	3573	4648	4242
Chlorobi	Chlorobia	Chlorobiales	Chlorobiaceae	Prosthecochloris	3570	4595	4212
Proteobacteria	Alphaproteobacteria	Rickettsiales	Rickettsiaceae	Rickettsia	3564	4587	4167
Firmicutes	Bacilli	Bacillales	Listeriaceae	Listeria	3555	4495	4150
Proteobacteria	Gammaproteobacteria	Enterobacteriales	Enterobacteriaceae	Erwinia	3528	4461	4128
Actinobacteria	Actinobacteria (class)	Actinomycetales	Nocardioidaceae	Kribbella	3516	4443	4114
Proteobacteria	Alphaproteobacteria	Rhodobacterales	Rhodobacteraceae	Ketogulonicigenium	3501	4440	4089
Bacteroidetes	Flavobacteria	Flavobacteriales	Flavobacteriaceae	Riemerella	3444	4419	4068
Actinobacteria	Actinobacteria (class)	Actinomycetales	Pseudonocardiaceae	Amycolatopsis	3430	4412	4064
Actinobacteria	Actinobacteria (class)	Actinomycetales	Pseudonocardiaceae	Thermobispora	3426	4368	4038
Lentisphaerae	unclassified (derived from Lentisphaerae)	unclassified (derived from Lentisphaerae)	Victivallaceae	Victivallis	3420	4367	4004
Firmicutes	Bacilli	Bacillales	Paenibacillaceae	Brevibacillus	3397	4330	3988
Bacteroidetes	Bacteroidia	Bacteroidales	Rikenellaceae	Alistipes	3383	4305	3969
Proteobacteria	Betaproteobacteria	Burkholderiales	Burkholderiaceae	Limnobacter	3360	4269	3961
Proteobacteria	Gammaproteobacteria	Cardiobacteriales	Cardiobacteriaceae	Dichelobacter	3354	4214	3895
Chlamydiae	Chlamydiae (class)	Chlamydiales	Waddliaceae	Waddlia	3343	4209	3891
Cyanobacteria	unclassified (derived from Cyanobacteria)	Chroococcales	unclassified (derived from Chroococcales)	Crocosphaera	3335	4207	3817
Proteobacteria	Gammaproteobacteria	Enterobacteriales	Enterobacteriaceae	Citrobacter	3333	4173	3804
Firmicutes	Clostridia	Thermoanaerobacterales	Thermoanaerobacteraceae	Ammonifex	3332	4165	3786
Cyanobacteria	unclassified (derived from Cyanobacteria)	Oscillatoriales	unclassified (derived from Oscillatoriales)	Oscillatoria	3330	4132	3783
Proteobacteria	Betaproteobacteria	Burkholderiales	Comamonadaceae	Comamonas	3327	4127	3756
Proteobacteria	Epsilonproteobacteria	Campylobacterales	Campylobacteraceae	Sulfurospirillum	3283	4103	3748
Proteobacteria	Gammaproteobacteria	Enterobacteriales	Enterobacteriaceae	Cronobacter	3274	4079	3732
Acidobacteria	Acidobacteria (class)	Acidobacteriales	Acidobacteriaceae	Terriglobus	3272	4061	3722
Actinobacteria	Actinobacteria (class)	Actinomycetales	Nakamurellaceae	Nakamurella	3261	4039	3661
unclassified (derived from Bacteria)	unclassified (derived from Bacteria)	unclassified (derived from Bacteria)	unclassified (derived from Bacteria)	Candidatus Cloacamonas	3261	4041	3721
Proteobacteria	Alphaproteobacteria	Rhizobiales	Beijerinckiaceae	Beijerinckia	3253	4025	3642
Thermotogae	Thermotogae (class)	Thermotogales	Thermotogaceae	Petrotoga	3246	4013	3639
Actinobacteria	Actinobacteria (class)	Actinomycetales	Glycomycetaceae	Stackebrandtia	3197	3968	3606
Proteobacteria	Alphaproteobacteria	Rhizobiales	Methylocystaceae	Methylosinus	3184	3950	3570
Proteobacteria	Alphaproteobacteria	Rhodospirillales	Acetobacteraceae	Gluconobacter	3156	3947	3559
Firmicutes	Clostridia	Natranaerobiales	Natranaerobiaceae	Natranaerobius	3155	3886	3529
Firmicutes	Clostridia	Thermoanaerobacterales	Thermoanaerobacterales Family III. Incertae Sedis	Thermosediminibacter	3109	3809	3523
Firmicutes	Bacilli	Bacillales	Bacillaceae	Oceanobacillus	3100	3785	3495
Actinobacteria	Actinobacteria (class)	Actinomycetales	Kineosporiaceae	Kineococcus	3095	3771	3483
Actinobacteria	Actinobacteria (class)	Bifidobacteriales	Bifidobacteriaceae	Bifidobacterium	3070	3766	3473
Firmicutes	Clostridia	Clostridiales	Syntrophomonadaceae	Dethiobacter	3059	3740	3418
Verrucomicrobia	unclassified (derived from Verrucomicrobia)	Methylacidiphilales	Methylacidiphilaceae	Methylacidiphilum	3054	3738	3409
Thermotogae	Thermotogae (class)	Thermotogales	Thermotogaceae	Kosmotoga	3050	3619	3407
Proteobacteria	Betaproteobacteria	Burkholderiales	Comamonadaceae	Alicycliphilus	3036	3582	3321
Synergistetes	Synergistia	Synergistales	Synergistaceae	Dethiosulfovibrio	3036	3588	3371
Thermotogae	Thermotogae (class)	Thermotogales	Thermotogaceae	Fervidobacterium	3000	3575	3229
Firmicutes	Bacilli	Lactobacillales	Enterococcaceae	Enterococcus	2975	3574	3229
Verrucomicrobia	Opitutae	unclassified (derived from Opitutae)	Opitutaceae	unclassified (derived from Opitutaceae)	2968	3564	3185
Aquificae	Aquificae (class)	Aquificales	Hydrogenothermaceae	Persephonella	2949	3540	3171
Proteobacteria	Gammaproteobacteria	Pasteurellales	Pasteurellaceae	Histophilus	2937	3530	3130
Firmicutes	Clostridia	Clostridiales	Ruminococcaceae	Ruminococcus	2933	3529	3122
Chloroflexi	Dehalococcoidetes	unclassified (derived from Dehalococcoidetes)	unclassified (derived from Dehalococcoidetes)	Dehalogenimonas	2933	3528	3118
Proteobacteria	Alphaproteobacteria	Rhizobiales	Aurantimonadaceae	Fulvimarina	2915	3477	3071
Verrucomicrobia	Verrucomicrobiae	Verrucomicrobiales	Verrucomicrobiaceae	Akkermansia	2904	3475	3062
Actinobacteria	Actinobacteria (class)	Actinomycetales	Actinosynnemataceae	Actinosynnema	2901	3465	3046
Firmicutes	Negativicutes	Selenomonadales	Veillonellaceae	Selenomonas	2866	3439	2994
Proteobacteria	Epsilonproteobacteria	Campylobacterales	Helicobacteraceae	Wolinella	2841	3398	2975
Firmicutes	Negativicutes	Selenomonadales	Veillonellaceae	Thermosinus	2818	3306	2947
Actinobacteria	Actinobacteria (class)	Actinomycetales	Propionibacteriaceae	Propionibacterium	2709	3282	2923
Firmicutes	Clostridia	Halanaerobiales	Halobacteroidaceae	Acetohalobium	2709	3306	2926
Proteobacteria	Betaproteobacteria	Burkholderiales	Oxalobacteraceae	Oxalobacter	2687	3273	2911
Firmicutes	Bacilli	Bacillales	unclassified (derived from Bacillales)	Exiguobacterium	2684	3255	2911
Chlamydiae	Chlamydiae (class)	Chlamydiales	Parachlamydiaceae	Parachlamydia	2683	3241	2900
Proteobacteria	Gammaproteobacteria	Enterobacteriales	Enterobacteriaceae	Xenorhabdus	2621	3239	2896
Proteobacteria	Gammaproteobacteria	Cardiobacteriales	Cardiobacteriaceae	Cardiobacterium	2611	3158	2807
Spirochaetes	Spirochaetes (class)	Spirochaetales	Brachyspiraceae	Brachyspira	2611	3188	2843
Actinobacteria	Actinobacteria (class)	Actinomycetales	Nocardiopsaceae	Nocardiopsis	2609	3153	2792
Proteobacteria	Gammaproteobacteria	Pasteurellales	Pasteurellaceae	Aggregatibacter	2577	3147	2778
Aquificae	Aquificae (class)	Aquificales	Aquificaceae	Hydrogenivirga	2568	3135	2777
Proteobacteria	Gammaproteobacteria	Enterobacteriales	Enterobacteriaceae	Sodalis	2555	3122	2747
Proteobacteria	Alphaproteobacteria	Sphingomonadales	Sphingomonadaceae	Zymomonas	2517	3121	2698
Actinobacteria	Actinobacteria (class)	Actinomycetales	Pseudonocardiaceae	Saccharomonospora	2479	3116	2683
Firmicutes	Clostridia	Clostridiales	Syntrophomonadaceae	Syntrophothermus	2477	3040	2648
Synergistetes	Synergistia	Synergistales	Synergistaceae	Thermanaerovibrio	2469	2962	2612
Proteobacteria	Gammaproteobacteria	Pasteurellales	Pasteurellaceae	Basfia	2455	2949	2608
Proteobacteria	Alphaproteobacteria	Caulobacterales	Caulobacteraceae	Asticcacaulis	2452	2941	2565
Actinobacteria	Actinobacteria (class)	Actinomycetales	Beutenbergiaceae	Beutenbergia	2449	2910	2556
Actinobacteria	Actinobacteria (class)	Actinomycetales	Intrasporangiaceae	Intrasporangium	2421	2903	2538
Proteobacteria	Alphaproteobacteria	Rhizobiales	Bradyrhizobiaceae	Afipia	2390	2863	2531
Cyanobacteria	unclassified (derived from Cyanobacteria)	Nostocales	Nostocaceae	Nodularia	2385	2849	2497
Fusobacteria	Fusobacteria (class)	Fusobacteriales	Fusobacteriaceae	Ilyobacter	2381	2756	2478
Firmicutes	Negativicutes	Selenomonadales	Veillonellaceae	Veillonella	2359	2728	2451
Fibrobacteres	Fibrobacteres (class)	Fibrobacterales	Fibrobacteraceae	Fibrobacter	2330	2711	2435
Actinobacteria	Actinobacteria (class)	Actinomycetales	Intrasporangiaceae	Janibacter	2281	2695	2426
Proteobacteria	Gammaproteobacteria	Legionellales	Coxiellaceae	Rickettsiella	2275	2653	2425
Actinobacteria	Actinobacteria (class)	Actinomycetales	Actinomycetaceae	Actinomyces	2271	2620	2414
unclassified (derived from Bacteria)	unclassified (derived from Bacteria)	unclassified (derived from Bacteria)	unclassified (derived from Bacteria)	unclassified (derived from Bacteria)	2250	2585	2409
Proteobacteria	Epsilonproteobacteria	Nautiliales	Nautiliaceae	Nautilia	2210	2557	2372
Firmicutes	Bacilli	Bacillales	Bacillaceae	Anoxybacillus	2199	2483	2338
Actinobacteria	Actinobacteria (class)	Actinomycetales	Microbacteriaceae	Clavibacter	2182	2408	2334
Firmicutes	Clostridia	Halanaerobiales	Halanaerobiaceae	Halanaerobium	2158	2405	2332
Spirochaetes	Spirochaetes (class)	Spirochaetales	Spirochaetaceae	Borrelia	2156	2376	2274
Proteobacteria	Gammaproteobacteria	Enterobacteriales	Enterobacteriaceae	Shigella	2144	2332	2258
Synergistetes	Synergistia	Synergistales	Synergistaceae	Anaerobaculum	2135	2324	2243
Chlamydiae	Chlamydiae (class)	Chlamydiales	Chlamydiaceae	Chlamydophila	2094	2217	2215
Firmicutes	Bacilli	Bacillales	Bacillaceae	Lysinibacillus	2033	2177	2190
Firmicutes	Clostridia	Thermoanaerobacterales	Thermoanaerobacterales Family III. Incertae Sedis	Thermoanaerobacterium	2011	2164	2120
Synergistetes	Synergistia	Synergistales	Synergistaceae	Aminobacterium	2003	2149	2116
Actinobacteria	Actinobacteria (class)	Actinomycetales	Brevibacteriaceae	Brevibacterium	2002	2103	2115
Proteobacteria	Deltaproteobacteria	Desulfovibrionales	Desulfovibrionaceae	Lawsonia	1996	2098	2108
Bacteroidetes	Bacteroidia	Bacteroidales	unclassified (derived from Bacteroidales)	Candidatus Azobacteroides	1993	2085	2103
Firmicutes	Clostridia	Clostridiales	Ruminococcaceae	Acetivibrio	1975	2034	2099
Actinobacteria	Actinobacteria (class)	Actinomycetales	Cellulomonadaceae	Cellulomonas	1955	2009	2066
Firmicutes	Negativicutes	Selenomonadales	Acidaminococcaceae	Acidaminococcus	1955	2011	2082
Actinobacteria	Actinobacteria (class)	Actinomycetales	Gordoniaceae	Gordonia	1937	1963	2063
Proteobacteria	Gammaproteobacteria	Pseudomonadales	Moraxellaceae	Enhydrobacter	1930	1942	2034
Fusobacteria	Fusobacteria (class)	Fusobacteriales	Fusobacteriaceae	Sebaldella	1915	1883	2013
Proteobacteria	Gammaproteobacteria	Enterobacteriales	Enterobacteriaceae	Buchnera	1899	1869	2012
Proteobacteria	Alphaproteobacteria	Rickettsiales	Anaplasmataceae	Wolbachia	1873	1858	1965
Elusimicrobia	Elusimicrobia (class)	Elusimicrobiales	Elusimicrobiaceae	Elusimicrobium	1849	1823	1958
Proteobacteria	Alphaproteobacteria	Rhodospirillales	Acetobacteraceae	Acetobacter	1844	1814	1947
Proteobacteria	Gammaproteobacteria	Pseudomonadales	Moraxellaceae	Moraxella	1796	1780	1946
Proteobacteria	Betaproteobacteria	Methylophilales	unclassified (derived from Methylophilales)	unclassified (derived from Methylophilales)	1791	1771	1943
Proteobacteria	Alphaproteobacteria	Sphingomonadales	Sphingomonadaceae	Citromicrobium	1783	1764	1880
Fusobacteria	Fusobacteria (class)	Fusobacteriales	Fusobacteriaceae	Leptotrichia	1781	1752	1867
Actinobacteria	Actinobacteria (class)	Coriobacteriales	Coriobacteriaceae	Slackia	1765	1742	1854
Actinobacteria	Actinobacteria (class)	Actinomycetales	Dermacoccaceae	Kytococcus	1758	1702	1848
Actinobacteria	Actinobacteria (class)	Actinomycetales	Tsukamurellaceae	Tsukamurella	1751	1699	1821
Actinobacteria	Actinobacteria (class)	Actinomycetales	Sanguibacteraceae	Sanguibacter	1741	1660	1808
Aquificae	Aquificae (class)	Aquificales	Aquificaceae	Hydrogenobacter	1732	1659	1793
Actinobacteria	Actinobacteria (class)	Actinomycetales	Microbacteriaceae	Leifsonia	1729	1656	1788
Thermotogae	Thermotogae (class)	Thermotogales	unclassified (derived from Thermotogales)	unclassified (derived from Thermotogales)	1723	1652	1787
Firmicutes	Clostridia	Thermoanaerobacterales	Thermodesulfobiaceae	Coprothermobacter	1700	1642	1785
Proteobacteria	Epsilonproteobacteria	Nautiliales	Nautiliaceae	Caminibacter	1684	1636	1753
Firmicutes	Clostridia	Clostridiales	Clostridiales Family XI. Incertae Sedis	Anaerococcus	1681	1618	1733
Actinobacteria	Actinobacteria (class)	unclassified (derived from Actinobacteria (class))	unclassified (derived from Actinobacteria (class))	unclassified (derived from Actinobacteria (class))	1670	1609	1725
Tenericutes	Mollicutes	Mycoplasmatales	Mycoplasmataceae	Mycoplasma	1651	1603	1712
Firmicutes	Erysipelotrichi	Erysipelotrichales	Erysipelotrichaceae	unclassified (derived from Erysipelotrichaceae)	1625	1554	1691
Actinobacteria	Actinobacteria (class)	Actinomycetales	Nocardioidaceae	Aeromicrobium	1596	1553	1668
Actinobacteria	Actinobacteria (class)	Actinomycetales	Promicromonosporaceae	Xylanimonas	1591	1524	1663
Actinobacteria	Actinobacteria (class)	Coriobacteriales	Coriobacteriaceae	Eggerthella	1582	1523	1632
Firmicutes	Clostridia	Clostridiales	Clostridiales Family XI. Incertae Sedis	Peptoniphilus	1582	1511	1587
Actinobacteria	Actinobacteria (class)	Coriobacteriales	Coriobacteriaceae	Atopobium	1563	1510	1571
Aquificae	Aquificae (class)	Aquificales	Aquificaceae	Hydrogenobaculum	1538	1504	1551
Proteobacteria	Gammaproteobacteria	Pasteurellales	Pasteurellaceae	Mannheimia	1522	1497	1532
Firmicutes	Bacilli	Lactobacillales	Streptococcaceae	Lactococcus	1515	1479	1511
Synergistetes	Synergistia	Synergistales	Synergistaceae	Aminomonas	1466	1469	1501
Chlamydiae	Chlamydiae (class)	Chlamydiales	Chlamydiaceae	Chlamydia	1456	1469	1495
Cyanobacteria	unclassified (derived from Cyanobacteria)	Nostocales	Nostocaceae	Cylindrospermopsis	1448	1428	1483
Proteobacteria	Betaproteobacteria	unclassified (derived from Betaproteobacteria)	unclassified (derived from Betaproteobacteria)	unclassified (derived from Betaproteobacteria)	1430	1405	1482
Aquificae	Aquificae (class)	Aquificales	Aquificaceae	Thermocrinis	1428	1381	1465
Actinobacteria	Actinobacteria (class)	Actinomycetales	Dermabacteraceae	Brachybacterium	1401	1348	1440
Cyanobacteria	unclassified (derived from Cyanobacteria)	Chroococcales	unclassified (derived from Chroococcales)	Cyanobium	1396	1314	1429
Actinobacteria	Actinobacteria (class)	Actinomycetales	Micrococcaceae	Micrococcus	1379	1282	1428
Proteobacteria	Betaproteobacteria	Burkholderiales	unclassified (derived from Burkholderiales)	unclassified (derived from Burkholderiales)	1377	1281	1417
Actinobacteria	Actinobacteria (class)	Coriobacteriales	Coriobacteriaceae	Collinsella	1376	1253	1413
Proteobacteria	Gammaproteobacteria	Vibrionales	unclassified (derived from Vibrionales)	unclassified (derived from Vibrionales)	1372	1244	1373
Bacteroidetes	Flavobacteria	Flavobacteriales	Blattabacteriaceae	Blattabacterium	1360	1227	1362
Firmicutes	Clostridia	Clostridiales	Lachnospiraceae	Butyrivibrio	1334	1224	1349
Firmicutes	Clostridia	Clostridiales	Ruminococcaceae	Ethanoligenens	1330	1215	1329
Actinobacteria	Actinobacteria (class)	Actinomycetales	Actinomycetaceae	Mobiluncus	1284	1206	1293
Firmicutes	Clostridia	Clostridiales	Clostridiales Family XI. Incertae Sedis	Finegoldia	1270	1184	1274
Firmicutes	Clostridia	Clostridiales	unclassified (derived from Clostridiales)	unclassified (derived from Clostridiales)	1260	1146	1247
Actinobacteria	Actinobacteria (class)	Actinomycetales	Micrococcaceae	Kocuria	1259	1145	1241
Actinobacteria	Actinobacteria (class)	Actinomycetales	Micrococcaceae	Rothia	1254	1122	1241
Firmicutes	Bacilli	Lactobacillales	Leuconostocaceae	Leuconostoc	1253	1090	1234
Actinobacteria	Actinobacteria (class)	Actinomycetales	Micrococcaceae	Renibacterium	1252	1087	1218
Proteobacteria	Betaproteobacteria	Neisseriales	Neisseriaceae	Eikenella	1240	1068	1199
Firmicutes	Clostridia	Clostridiales	Ruminococcaceae	Anaerotruncus	1228	1054	1194
Proteobacteria	Alphaproteobacteria	Rickettsiales	Anaplasmataceae	Ehrlichia	1223	1052	1186
Synergistetes	Synergistia	Synergistales	Synergistaceae	Pyramidobacter	1223	1025	1171
Firmicutes	Negativicutes	Selenomonadales	Veillonellaceae	Megasphaera	1211	1023	1161
Actinobacteria	Actinobacteria (class)	Actinomycetales	Jonesiaceae	Jonesia	1206	1018	1131
Firmicutes	Negativicutes	Selenomonadales	Veillonellaceae	Mitsuokella	1197	1011	1100
Firmicutes	Clostridia	Clostridiales	unclassified (derived from Clostridiales)	Blautia	1192	1003	1096
Proteobacteria	Betaproteobacteria	Neisseriales	Neisseriaceae	Simonsiella	1168	958	1095
Firmicutes	Clostridia	Clostridiales	Lachnospiraceae	Cellulosilyticum	1145	936	1084
Cyanobacteria	unclassified (derived from Cyanobacteria)	Nostocales	Nostocaceae	Raphidiopsis	1122	928	1077
Proteobacteria	Betaproteobacteria	Neisseriales	Neisseriaceae	Kingella	1116	924	1067
Proteobacteria	Gammaproteobacteria	Enterobacteriales	Enterobacteriaceae	Candidatus Hamiltonella	1083	921	1066
Actinobacteria	Actinobacteria (class)	Coriobacteriales	Coriobacteriaceae	Cryptobacterium	1063	911	1008
Actinobacteria	Actinobacteria (class)	Actinomycetales	Segniliparaceae	Segniliparus	1059	879	967
Firmicutes	Bacilli	Lactobacillales	Lactobacillaceae	Pediococcus	1028	876	947
Firmicutes	Clostridia	Clostridiales	Ruminococcaceae	Faecalibacterium	1021	857	920
Proteobacteria	Alphaproteobacteria	Rickettsiales	unclassified (derived from Rickettsiales)	unclassified (derived from Rickettsiales)	1019	851	910
Elusimicrobia	unclassified (derived from Elusimicrobia)	unclassified (derived from Elusimicrobia)	unclassified (derived from Elusimicrobia)	unclassified (derived from Elusimicrobia)	976	848	904
Actinobacteria	Actinobacteria (class)	Actinomycetales	Dermacoccaceae	Dermacoccus	968	842	885
Firmicutes	Clostridia	Clostridiales	Peptostreptococcaceae	Peptostreptococcus	965	837	861
Firmicutes	Clostridia	Clostridiales	Lachnospiraceae	Roseburia	960	829	855
Firmicutes	Erysipelotrichi	Erysipelotrichales	Erysipelotrichaceae	Holdemania	955	823	852
Firmicutes	Negativicutes	Selenomonadales	Veillonellaceae	Dialister	955	807	844
Synergistetes	Synergistia	Synergistales	Synergistaceae	Jonquetella	949	798	841
Firmicutes	Clostridia	Clostridiales	Lachnospiraceae	Oribacterium	948	761	836
Proteobacteria	Gammaproteobacteria	Enterobacteriales	Enterobacteriaceae	Candidatus Regiella	913	745	796
Firmicutes	Clostridia	Clostridiales	Lachnospiraceae	Dorea	912	692	771
Firmicutes	Clostridia	Clostridiales	Lachnospiraceae	unclassified (derived from Lachnospiraceae)	912	684	762
Firmicutes	Bacilli	Bacillales	Staphylococcaceae	Macrococcus	893	673	747
Firmicutes	Erysipelotrichi	Erysipelotrichales	Erysipelotrichaceae	Turicibacter	887	659	743
Firmicutes	Clostridia	Clostridiales	Lachnospiraceae	Coprococcus	885	634	730
Proteobacteria	Gammaproteobacteria	Enterobacteriales	Enterobacteriaceae	Candidatus Blochmannia	880	603	724
Actinobacteria	Actinobacteria (class)	Coriobacteriales	Coriobacteriaceae	Olsenella	867	589	723
Bacteroidetes	Flavobacteria	Flavobacteriales	unclassified (derived from Flavobacteriales)	Candidatus Sulcia	804	589	721
Proteobacteria	Alphaproteobacteria	Rickettsiales	Anaplasmataceae	Anaplasma	797	585	706
Firmicutes	Clostridia	Clostridiales	Eubacteriaceae	Anaerofustis	788	560	701
Firmicutes	Clostridia	Clostridiales	Lachnospiraceae	Anaerostipes	777	557	690
Fusobacteria	Fusobacteria (class)	Fusobacteriales	Fusobacteriaceae	Streptobacillus	734	556	680
Tenericutes	Mollicutes	Acholeplasmatales	Acholeplasmataceae	Acholeplasma	725	540	672
Firmicutes	Clostridia	Clostridiales	Ruminococcaceae	unclassified (derived from Ruminococcaceae)	677	532	643
Actinobacteria	Actinobacteria (class)	Actinomycetales	unclassified (derived from Actinomycetales)	Tropheryma	652	532	618
Firmicutes	Bacilli	Lactobacillales	Carnobacteriaceae	Granulicatella	645	519	614
Actinobacteria	Actinobacteria (class)	Actinomycetales	Actinomycetaceae	Arcanobacterium	598	516	603
Firmicutes	Clostridia	Clostridiales	Ruminococcaceae	Subdoligranulum	585	513	586
Firmicutes	Bacilli	Lactobacillales	Leuconostocaceae	Oenococcus	582	503	580
Proteobacteria	Alphaproteobacteria	Rickettsiales	Rickettsiaceae	Orientia	574	490	557
Firmicutes	Clostridia	Clostridiales	Eubacteriaceae	Pseudoramibacter	559	482	552
Cyanobacteria	unclassified (derived from Cyanobacteria)	Chroococcales	unclassified (derived from Chroococcales)	unclassified (derived from Chroococcales)	539	481	544
Firmicutes	Bacilli	Lactobacillales	Aerococcaceae	Abiotrophia	522	470	517
Firmicutes	Clostridia	Clostridiales	Peptostreptococcaceae	Filifactor	521	465	512
Proteobacteria	Alphaproteobacteria	Rickettsiales	Anaplasmataceae	Neorickettsia	506	457	508
Firmicutes	Bacilli	Lactobacillales	Carnobacteriaceae	Carnobacterium	505	416	499
Firmicutes	Clostridia	Clostridiales	unclassified (derived from Clostridiales)	Epulopiscium	484	416	489
Proteobacteria	Alphaproteobacteria	Rhizobiales	Rhizobiaceae	Candidatus Liberibacter	480	396	489
Firmicutes	Erysipelotrichi	Erysipelotrichales	Erysipelotrichaceae	Catenibacterium	479	381	480
Firmicutes	Clostridia	Clostridiales	Clostridiales Family XI. Incertae Sedis	unclassified (derived from Clostridiales Family XI. Incertae Sedis)	465	347	437
Actinobacteria	Actinobacteria (class)	Bifidobacteriales	Bifidobacteriaceae	Gardnerella	460	345	415
Firmicutes	Bacilli	Bacillales	unclassified (derived from Bacillales)	Gemella	460	317	413
Firmicutes	Bacilli	Lactobacillales	Aerococcaceae	Aerococcus	375	313	400
Proteobacteria	Gammaproteobacteria	Enterobacteriales	Enterobacteriaceae	Wigglesworthia	371	312	384
Firmicutes	Clostridia	Clostridiales	Lachnospiraceae	Catonella	337	306	374
Firmicutes	Clostridia	Clostridiales	Lachnospiraceae	Shuttleworthia	334	305	363
Firmicutes	Erysipelotrichi	Erysipelotrichales	Erysipelotrichaceae	Erysipelothrix	331	282	300
Tenericutes	Mollicutes	Acholeplasmatales	Acholeplasmataceae	Candidatus Phytoplasma	322	270	269
Firmicutes	Bacilli	Lactobacillales	Aerococcaceae	Eremococcus	318	265	253
Firmicutes	Erysipelotrichi	Erysipelotrichales	Erysipelotrichaceae	Coprobacillus	313	236	250
Firmicutes	Bacilli	Lactobacillales	Leuconostocaceae	Weissella	300	197	247
Actinobacteria	Actinobacteria (class)	Bifidobacteriales	Bifidobacteriaceae	Parascardovia	282	194	242
Proteobacteria	Gammaproteobacteria	Enterobacteriales	Enterobacteriaceae	Candidatus Riesia	255	184	238
Tenericutes	Mollicutes	Entomoplasmatales	Entomoplasmataceae	Mesoplasma	246	166	235
Actinobacteria	Actinobacteria (class)	Bifidobacteriales	Bifidobacteriaceae	Scardovia	236	156	208
Firmicutes	Erysipelotrichi	Erysipelotrichales	Erysipelotrichaceae	Bulleidia	212	151	191
Tenericutes	Mollicutes	Mycoplasmatales	Mycoplasmataceae	Ureaplasma	112	149	88
Proteobacteria	Gammaproteobacteria	Thiotrichales	unclassified (derived from Thiotrichales)	unclassified (derived from Thiotrichales)	91	66	69
Proteobacteria	unclassified (derived from Proteobacteria)	unclassified (derived from Proteobacteria)	unclassified (derived from Proteobacteria)	unclassified (derived from Proteobacteria)	46	52	52
Proteobacteria	Gammaproteobacteria	Legionellales	Legionellaceae	Fluoribacter	27	47	34
Proteobacteria	Gammaproteobacteria	Alteromonadales	Alteromonadaceae	Glaciecola	27	47	32
Proteobacteria	Gammaproteobacteria	Vibrionales	Vibrionaceae	Listonella	20	22	32
Proteobacteria	Betaproteobacteria	Burkholderiales	Oxalobacteraceae	Candidatus Zinderia	17	18	16
Proteobacteria	Gammaproteobacteria	unclassified (derived from Gammaproteobacteria)	unclassified (derived from Gammaproteobacteria)	Candidatus Carsonella	14	13	14
Proteobacteria	Alphaproteobacteria	Rhizobiales	unclassified (derived from Rhizobiales)	Candidatus Hodgkinia	8	5	5
Nitrospirae	Nitrospira (class)	Nitrospirales	Nitrospiraceae	Leptospirillum	8	12	13
Proteobacteria	Betaproteobacteria	Burkholderiales	Oxalobacteraceae	Collimonas	1	1	3
Bacteroidetes	Flavobacteria	Flavobacteriales	Flavobacteriaceae	Ornithobacterium	1	3	5
Tenericutes	Mollicutes	Entomoplasmatales	Spiroplasmataceae	Spiroplasma	0	0	0
Cyanobacteria	unclassified (derived from Cyanobacteria)	Oscillatoriales	unclassified (derived from Oscillatoriales)	Leptolyngbya	0	1	0

## Sheet: Table S4
Table S4. The distribution and total number of hits of archaeal genera in the three metagenomes studied.
Phylum	Class	Order	Family	Genus	GTV1902	GTV1904	GTV1906
Euryarchaeota	unclassified (derived from Euryarchaeota)	unclassified (derived from Euryarchaeota)	unclassified (derived from Euryarchaeota)	Aciduliprofundum	88227	31635	132543
Euryarchaeota	Thermococci	Thermococcales	Thermococcaceae	Thermococcus	73016	12648	23845
Euryarchaeota	Methanomicrobia	Methanosarcinales	Methanosarcinaceae	Methanosarcina	68818	8391	19349
Euryarchaeota	Archaeoglobi	Archaeoglobales	Archaeoglobaceae	Archaeoglobus	66176	6016	12339
Euryarchaeota	Thermococci	Thermococcales	Thermococcaceae	Pyrococcus	53220	4996	10509
Euryarchaeota	Methanococci	Methanococcales	Methanocaldococcaceae	Methanocaldococcus	42119	4937	9559
Euryarchaeota	Methanobacteria	Methanobacteriales	Methanobacteriaceae	Methanothermobacter	36371	4642	8797
Euryarchaeota	Methanomicrobia	Methanosarcinales	Methanosaetaceae	Methanosaeta	34497	4054	7078
Euryarchaeota	unclassified (derived from Euryarchaeota)	unclassified (derived from Euryarchaeota)	unclassified (derived from Euryarchaeota)	unclassified (derived from Euryarchaeota)	32733	3481	6907
Euryarchaeota	Thermoplasmata	Thermoplasmatales	Thermoplasmataceae	Thermoplasma	31115	3376	6104
Euryarchaeota	Archaeoglobi	Archaeoglobales	Archaeoglobaceae	Ferroglobus	26504	3323	5851
Crenarchaeota	Thermoprotei	Sulfolobales	Sulfolobaceae	Sulfolobus	23058	2847	4967
Euryarchaeota	Methanomicrobia	Methanosarcinales	Methanosarcinaceae	Methanococcoides	22720	2753	4963
Euryarchaeota	Methanococci	Methanococcales	Methanococcaceae	Methanococcus	22519	2712	4639
Crenarchaeota	Thermoprotei	Thermoproteales	Thermoproteaceae	Pyrobaculum	21352	2526	4594
Euryarchaeota	Methanopyri	Methanopyrales	Methanopyraceae	Methanopyrus	20769	2422	4478
Euryarchaeota	Methanomicrobia	Methanomicrobiales	Methanomicrobiaceae	Methanoculleus	20062	2391	4420
Thaumarchaeota	unclassified (derived from Thaumarchaeota)	Nitrosopumilales	Nitrosopumilaceae	Nitrosopumilus	17626	2076	3604
Euryarchaeota	Methanomicrobia	Methanocellales	Methanocellaceae	Methanocella	17528	2022	3361
Euryarchaeota	Halobacteria	Halobacteriales	Halobacteriaceae	Haloarcula	16420	1973	3316
Euryarchaeota	Thermoplasmata	Thermoplasmatales	Picrophilaceae	Picrophilus	16048	1739	3254
Euryarchaeota	Methanomicrobia	Methanosarcinales	Methanosarcinaceae	Methanohalophilus	15164	1714	3249
Crenarchaeota	Thermoprotei	Thermoproteales	Thermofilaceae	Thermofilum	15154	1642	3089
Euryarchaeota	Methanomicrobia	Methanomicrobiales	unclassified (derived from Methanomicrobiales)	Methanoregula	14175	1624	2979
Korarchaeota	unclassified (derived from Korarchaeota)	unclassified (derived from Korarchaeota)	unclassified (derived from Korarchaeota)	Candidatus Korarchaeum	13507	1541	2890
Euryarchaeota	Methanomicrobia	Methanosarcinales	Methanosarcinaceae	Methanohalobium	13293	1499	2771
Euryarchaeota	Methanobacteria	Methanobacteriales	Methanobacteriaceae	Methanobrevibacter	12898	1473	2648
Euryarchaeota	Methanomicrobia	Methanomicrobiales	Methanospirillaceae	Methanospirillum	12578	1375	2596
Crenarchaeota	Thermoprotei	Desulfurococcales	Desulfurococcaceae	Staphylothermus	12372	1375	2582
Euryarchaeota	Halobacteria	Halobacteriales	Halobacteriaceae	Natronomonas	12118	1367	2575
Euryarchaeota	Methanomicrobia	Methanomicrobiales	unclassified (derived from Methanomicrobiales)	Methanosphaerula	11795	1361	2560
Euryarchaeota	Halobacteria	Halobacteriales	Halobacteriaceae	Halogeometricum	10710	1291	2519
Euryarchaeota	Methanobacteria	Methanobacteriales	Methanothermaceae	Methanothermus	10685	1169	2356
Crenarchaeota	Thermoprotei	Desulfurococcales	Desulfurococcaceae	Aeropyrum	10401	1160	2093
Crenarchaeota	Thermoprotei	Desulfurococcales	Pyrodictiaceae	Hyperthermus	10107	1130	2028
Euryarchaeota	Halobacteria	Halobacteriales	Halobacteriaceae	Halobacterium	9973	1119	1975
Thaumarchaeota	unclassified (derived from Thaumarchaeota)	Cenarchaeales	Cenarchaeaceae	Cenarchaeum	8082	1091	1968
Euryarchaeota	Halobacteria	Halobacteriales	Halobacteriaceae	Haloferax	7848	1084	1856
Euryarchaeota	Methanomicrobia	Methanomicrobiales	Methanomicrobiaceae	Methanoplanus	7658	1071	1810
Euryarchaeota	Halobacteria	Halobacteriales	Halobacteriaceae	Haloterrigena	7455	1058	1807
Euryarchaeota	Halobacteria	Halobacteriales	Halobacteriaceae	Halorhabdus	7347	1054	1718
Euryarchaeota	Halobacteria	Halobacteriales	Halobacteriaceae	Halomicrobium	7002	963	1695
Euryarchaeota	Thermoplasmata	Thermoplasmatales	Ferroplasmaceae	Ferroplasma	6762	954	1663
Euryarchaeota	Methanobacteria	Methanobacteriales	Methanobacteriaceae	Methanosphaera	6705	856	1631
Crenarchaeota	Thermoprotei	Desulfurococcales	Desulfurococcaceae	Ignicoccus	6602	847	1583
Euryarchaeota	Halobacteria	Halobacteriales	Halobacteriaceae	Halorubrum	6389	826	1564
Euryarchaeota	Halobacteria	Halobacteriales	Halobacteriaceae	Haloquadratum	5911	732	1445
Euryarchaeota	Methanomicrobia	Methanomicrobiales	Methanocorpusculaceae	Methanocorpusculum	5744	718	1380
Euryarchaeota	Halobacteria	Halobacteriales	Halobacteriaceae	Natrialba	5542	694	1353
Euryarchaeota	Halobacteria	Halobacteriales	Halobacteriaceae	Halalkalicoccus	4931	651	1303
Crenarchaeota	Thermoprotei	Thermoproteales	Thermoproteaceae	Vulcanisaeta	4518	422	811
Crenarchaeota	Thermoprotei	Thermoproteales	Thermoproteaceae	Caldivirga	4466	420	780
Crenarchaeota	Thermoprotei	Sulfolobales	Sulfolobaceae	Metallosphaera	4424	394	770
Crenarchaeota	Thermoprotei	Desulfurococcales	Desulfurococcaceae	Desulfurococcus	4265	381	745
Euryarchaeota	Methanococci	Methanococcales	Methanococcaceae	Methanothermococcus	4063	380	729
Crenarchaeota	Thermoprotei	Desulfurococcales	Desulfurococcaceae	Ignisphaera	3325	293	545
Crenarchaeota	Thermoprotei	Acidilobales	Acidilobaceae	Acidilobus	3319	288	533
Crenarchaeota	Thermoprotei	Desulfurococcales	Desulfurococcaceae	Thermosphaera	3072	253	488
Crenarchaeota	Thermoprotei	Thermoproteales	Thermoproteaceae	Thermoproteus	2292	209	436
Nanoarchaeota	unclassified (derived from Nanoarchaeota)	unclassified (derived from Nanoarchaeota)	unclassified (derived from Nanoarchaeota)	Nanoarchaeum	1825	146	289

## Sheet: Table S5
Table S5. Summary statistics of quality filtering and metagenomic assembly.
	GTV1902	GTV1904	GTV1906
Raw reads	19994532	20451514	23985160
Reads after qc	12048837	10286873	10081010
Assembled reads	7081440	6253956	1828632
Number of contigs	61732	57779	38882
contig_bp	98695452	103841596	58409612
Longest scaffold	105415	99270	39457
Shortest scaffold	500	500	500
N50 scaffold length	12795	9946	9769
L50 scacffold count	1669	2132	1555
Number of predicted genes	136614	133457	82575

## Sheet: Table S6
Table S6. The genome features for the metagenome assembled genomes from the three sediment samples.
Bin ID	MAG	Size (Mbp)	Gene count	Complet (%)	Contam(%)	Genome Quality	No. of contigs	N50	GC (%)	GTDB taxonomic classification
GTV1902_metabat_02	MAG01	5.04128	4305	93.41	2.3	High	465	15043	58.4608	d__Bacteria;p__KSB1;c__UBA2214;o__CR04bin15;f__;g__;s__
GTV1904_maxbin_11	MAG02	2.60942	3079	84.44	3.73	Medium	848	4171	32.0101	d__Bacteria;p__Bacteroidota;c__Bacteroidia;o__Flavobacteriales;f__Flavobacteriaceae;g__PRS1;s__
GTV1904_metabat_21	MAG03	2.44629	2613	55.17	1.87	Medium	938	2725	38.1328	d__Bacteria;p__Bacteroidota;c__Bacteroidia;o__Chitinophagales;f__Saprospiraceae;g__;s__
GTV1902_metabat_07	MAG04	2.69338	3027	89.15	2.28	Medium	541	6524	66.6943	d__Bacteria;p__Actinobacteriota;c__Acidimicrobiia;o__UBA5794;f__;g__;s__
GTV1904_maxbin_09	MAG05	2.43254	2615	95.98	2.42	High	268	16314	66.3088	d__Bacteria;p__Actinobacteriota;c__Acidimicrobiia;o__UBA5794;f__ZC4RG35;g__;s__
GTV1904_metabat_04	MAG06	3.04948	3076	98.29	3.92	High	213	22489	63.4959	d__Bacteria;p__Actinobacteriota;c__Acidimicrobiia;o__UBA5794;f__UBA5794;g__UBA5794;s__
GTV1904_metabat_03	MAG07	4.76003	3921	98.31	1.13	High	345	21378	65.7468	d__Bacteria;p__Bacteroidota;c__Rhodothermia;o__Rhodothermales;f__;g__;s__
GTV1902_metabat_05	MAG08	3.79159	3798	95.05	4.95	High	603	9306	69.5318	d__Bacteria;p__Gemmatimonadota;c__Gemmatimonadetes;o__;f__;g__;s__
GTV1902_metabat_06	MAG09	2.63345	2525	92.86	3.85	High	393	9470	67.3794	d__Bacteria;p__Gemmatimonadota;c__Gemmatimonadetes;o__;f__;g__;s__
GTV1906_metabat_02	MAG10	5.24038	5071	88.4	5.01	Medium	910	7321	48.7846	d__Bacteria;p__KSB1;c__UBA2214;o__CR04bin15;f__;g__;s__
GTV1902_metabat_01	MAG11	1.63663	1696	98.4	1.6	High	74	40459	68.5173	d__Archaea;p__Thermoplasmatota;c__Thermoplasmata;o__RBG-16-68-12;f__;g__;s__
GTV1902_metabat_04	MAG12	1.99956	2044	96.49	4	High	201	15263	65.2015	d__Archaea;p__Thermoplasmatota;c__Thermoplasmata;o__RBG-16-68-12;f__;g__;s__
GTV1902_metabat_03	MAG13	1.16202	1287	75.02	1.6	Medium	97	18164	62.0934	d__Archaea;p__Thermoplasmatota;c__Thermoplasmata;o__RBG-16-68-12;f__;g__;s__
GTV1904_metabat_11	MAG14	2.9499	3202	67.37	2.93	Medium	755	4423	54.7425	d__Bacteria;p__Proteobacteria;c__Gammaproteobacteria;o__Woeseiales;f__Woeseiaceae;g__SZUA-117;s__
GTV1904_maxbin_04	MAG15	1.60142	2040	66.94	3.98	Medium	801	2080	56.4548	d__Bacteria;p__Planctomycetota;c__Phycisphaerae;o__SM23-33;f__SM23-33;g__B1-G9;s__
GTV1904_metabat_02	MAG16	3.4932	3119	98.21	2.44	High	161	33936	44.0348	d__Bacteria;p__Bacteroidota;c__Bacteroidia;o__Cytophagales;f__Cyclobacteriaceae;g__;s__
GTV1904_maxbin_05	MAG17	3.38931	3182	96.77	2.3	High	436	14019	45.0109	d__Bacteria;p__Proteobacteria;c__Gammaproteobacteria;o__SZUA-229;f__SZUA-229;g__;s__
GTV1904_metabat_06	MAG18	4.97295	4700	83.82	2.73	Medium	621	11068	49.8954	d__Bacteria;p__Chloroflexota;c__Anaerolineae;o__Promineofilales;f__Promineofilaceae;g__GCA-2699125;s__
GTV1906_metabat_04	MAG19	2.11486	2441	73.96	2.58	Medium	479	4713	48.8727	d__Bacteria;p__Nitrospirota;c__Nitrospiria;o__Nitrospirales;f__UBA8639;g__;s__
GTV1906_metabat_06	MAG20	1.79615	1898	67.13	0.93	Medium	670	2724	33.8124	d__Archaea;p__Asgardarchaeota;c__Heimdallarchaeia;o__LC-3;f__LC-3;g__;s__

## Sheet: Tables S7
Table S7. The distribution and relative abundance of key genes of metabolic pathways studied in the three metagenomes.
KO	Gene Name	Cycle	GTV1902	GTV1904	GTV1906
K01601	rbcL, cbbL; ribulose-bisphosphate carboxylase large chain	Carbon	0.011987	0.900587	0.636076
K01602	rbcS, cbbS; ribulose-bisphosphate carboxylase small chain	Carbon	0.011987	0.657754	0.0822785
K00855	PRK, prkB; phosphoribulokinase	Carbon	0.011987	0.862135	0.142801
K15230	aclA; ATP-citrate lyase alpha-subunit	Carbon	0	0	0.240111
K15231	aclB; ATP-citrate lyase beta-subunit	Carbon	0	0.0323273	0.240111
K00169	porA; pyruvate ferredoxin oxidoreductase alpha subunit	Carbon	0.96566	0.0384518	0.493275
K00170	porB; pyruvate ferredoxin oxidoreductase beta subunit	Carbon	0.96566	0.0384518	0.493275
K00172	porC, porG; pyruvate ferredoxin oxidoreductase gamma subunit	Carbon	0.96566	0.0384518	0.240111
K00171	porD; pyruvate ferredoxin oxidoreductase delta subunit	Carbon	0.930993	0.147935	0.313687
K00174	korA, oorA, oforA; 2-oxoglutarate/2-oxoacid ferredoxin oxidoreductase subunit alpha	Carbon	1	0.463442	1
K00175	korB, oorB, oforB; 2-oxoglutarate/2-oxoacid ferredoxin oxidoreductase subunit beta	Carbon	1	0.419655	1
K00177	korC, oorC; 2-oxoglutarate ferredoxin oxidoreductase subunit gamma	Carbon	0.223762	0.219662	0.359177
K00176	korD, oorD; 2-oxoglutarate ferredoxin oxidoreductase subunit delta	Carbon	0.143516	0.209023	0.599288
K00196	cooF; anaerobic carbon-monoxide dehydrogenase iron sulfur subunit	Carbon	0	0	0.493275
K00198	cooS, acsA; anaerobic carbon-monoxide dehydrogenase catalytic subunit	Carbon	0	0.0278129	0
K14138	acsB; acetyl-CoA synthase	Carbon	0	0.0278129	0
K00193	cdhC; acetyl-CoA decarbonylase/synthase, CODH/ACS complex subunit beta	Carbon	0	0.0278129	0
K00194	cdhD, acsD; acetyl-CoA decarbonylase/synthase, CODH/ACS complex subunit delta	Carbon	0	0.0278129	0
K00197	cdhE, acsC; acetyl-CoA decarbonylase/synthase, CODH/ACS complex subunit gamma	Carbon	0.122956	0.282233	0.400712
K05299	fdhA;formate dehydrogenase (NADP+) alpha subunit	Carbon	0.145309	0.302974	0.0605222
K01908	prpE; propionyl-CoA synthetase	Carbon	0.0223528	0.141369	0.0237342
K08691	mcl; malyl-CoA/(S)-citramalyl-CoA lyase	Carbon	0.0223528	0	0
K14564	abfD; 4-hydroxybutyryl-CoA dehydratase	Carbon	0.808037	0	0.253165
K01011	TST, MPST, sseA; thiosulfate/3-mercaptopyruvate sulfurtransferase	Sulfur	1	0.972187	1
K11180	dsrA; dissimilatory sulfite reductase alpha subuni	Sulfur	0	0.547197	0
K11181	dsrB; dissimilatory sulfite reductase beta subunit	Sulfur	0	0.547197	0
K00394	aprA; adenylylsulfate reductase, subunit A	Sulfur	0	0.536558	0
K00395	aprB; adenylylsulfate reductase, subunit B	Sulfur	0	0.536558	0
K00958	sat, met3; sulfate adenylyltransferase	Sulfur	0.0997303	0.885686	0.917722
K17218	sqr; sulfide:quinone oxidoreductase	Sulfur	0.842377	1	0.759889
K17222	soxA; L-cysteine S-thiosulfotransferase	Sulfur	0.0343398	0.728406	0.106013
K17223	soxX; L-cysteine S-thiosulfotransferase	Sulfur	0.935404	0.752652	0.446203
K17224	soxB; S-sulfosulfanyl-L-cysteine sulfohydrolase	Sulfur	0	0.508745	0
K17225	soxC; sulfane dehydrogenase subunit SoxC	Sulfur	0	0.0384518	0
K17226	soxY; sulfur-oxidizing protein SoxY	Sulfur	0	0.508745	0
K17227	soxZ; sulfur-oxidizing protein SoxZ	Sulfur	0	0.508745	0
K02567	napA; nitrate reductase (cytochrome)	Nitrogen	0.0346671	0.508745	0
K02568	napB; nitrate reductase (cytochrome)	Nitrogen	0.0346671	0.508745	0
K00370	narG, narZ, nxrA; nitrate reductase / nitrite oxidoreductase, alpha subunit	Nitrogen	0.0223528	0.165425	0.276899
K00371	narH, narY, nxrB; nitrate reductase / nitrite oxidoreductase, beta subunit	Nitrogen	0.0223528	0.165425	0.276899
K00368	nirK; nitrite reductase (NO-forming)	Nitrogen	0.887955	0.85639	0.963212
K15864	nirS; nitrite reductase (NO-forming) / hydroxylamine reductase	Nitrogen	0.743441	0.547197	0
K04561	norB; nitric oxide reductase subunit B	Nitrogen	0	0.65769	0.036788
K02305	norC; nitric oxide reductase subunit C	Nitrogen	0.157623	0.847424	0.400712
K00376	nosZ; nitrous-oxide reductase	Nitrogen	0.790096	0.830818	0.119066
K00362	nirB; nitrite reductase (NADH) large subunit	Nitrogen	0.0650632	0.752526	0.640823
K00363	nirD; nitrite reductase (NADH) small subunit	Nitrogen	0.853616	0.508745	0.240111
K03385	nrfA; nitrite reductase (cytochrome c-552)	Nitrogen	0.189422	0.0948352	0.363924
K15876	nrfH; cytochrome c nitrite reductase small subunit	Nitrogen	0.157623	0	0.363924
K10535	hao; hydroxylamine dehydrogenase	Nitrogen	0.157623	0.0278129	0.363924
K18008	hydA; [NiFe] hydrogenase small subunit	Hydrogen	0	0.508745	0
K00437	hydB; [NiFe] hydrogenase large subunit	Hydrogen	0.0346671	0	0
K06281	hyaB, hybC; hydrogenase large subunit	Hydrogen	0.0773775	0.642537	0.036788
K06282	hyaA, hybO; hydrogenase small subunit	Hydrogen	0.0773775	0.674864	0.036788
K00404	ccoN; cytochrome c oxidase cbb3-type subunit I	Oxygen	0.0690069	0.883413	0.142801
K00405	ccoO; cytochrome c oxidase cbb3-type subunit II	Oxygen	0.191963	0.844961	0.746835
K00406	ccoP; cytochrome c oxidase cbb3-type subunit III	Oxygen	0.191963	0.929221	0.506725
K02274	coxA, ctaD; cytochrome c oxidase subunit I	Oxygen	0.968201	0.972187	0.759889
K02275	coxB, ctaC; cytochrome c oxidase subunit II	Oxygen	0.968201	0.972187	0.506725
K02276	coxC, ctaE; cytochrome c oxidase subunit III	Oxygen	0.968201	0.93986	0.759889
K02277	coxD, ctaF; cytochrome c oxidase subunit IV	Oxygen	0.157296	0.149009	0.446203
K16157	mmoX; methane monooxygenase component A alpha chain	Methane	0	0.0392726	0.240111

## Sheet: Table S8
Table S8. Taxonomy assignments of genes encoding key enzymes involved in Carbon fixation pathways detected in metagenomes. Only taxa with >1% of the total hits are shown.
Pathway/genes	Phylum/Class	GTV1902	Phylum/Class	GTV1904	Phylum/Class	GTV1906
CBB cycle rbcL, rbcS, prkB	Gammaproteobacteria	Nitrosococcus, Allochromatium, Thiomicrospira, Methylococcus, unclassified (derived from Gammaproteobacteria), Acidithiobacillus, Thioalkalivibrio, Alkalilimnicola, Halorhodospira,	Gammaproteobacteria	Allochromatium, Thioalkalivibrio, Methylococcus, Acidithiobacillus, unclassified (derived from Gammaproteobacteria), Nitrosococcus, Halorhodospira, Thiomicrospira, Alkalilimnicola, Halothiobacillus,	Gammaproteobacteria	Nitrosococcus, Methylococcus, Thioalkalivibrio, Allochromatium, Halorhodospira, unclassified (derived from Gammaproteobacteria), Acidithiobacillus, Alkalilimnicola, Thiomicrospira,
	Betaproteobacteria	Thiobacillus, Nitrosospira, Cupriavidus, Polaromonas, Nitrosomonas, Candidatus Accumulibacter	Betaproteobacteria	Cupriavidus, Thiobacillus, Nitrosomonas, Nitrosospira, Thiomonas, Polaromonas	Betaproteobacteria	Cupriavidus, Thiobacillus, Nitrosospira, Nitrosomonas, Polaromonas, Thiomonas
	Alphaproteobacteria	Rhodopseudomonas, Rhodospirillum, Magnetospirillum	Alphaproteobacteria	Rhodopseudomonas, Rhodobacter, Rhodospirillum, Bradyrhizobium ,	Alphaproteobacteria	Rhodopseudomonas, Bradyrhizobium, Rhodobacter, Rhodospirillum, Nitrobacter
			Verrucomicrobia	Methylacidiphilum	Verrucomicrobia	Methylacidiphilum
	Firmicutes	Ammonifex
	Planctomycetes	Planctomyces
	Cyanobacteria	Synechococcus	Cyanobacteria	Synechococcus, Prochlorococcus	Cyanobacteria	Synechococcus, Prochlorococcus,
	Euryarchaeota	Methanocaldococcus, Pyrococcus, Methanosarcina, Archaeoglobus, Methanoculleus, Methanoregula, Methanohalobium, Methanococcoides, Thermococcus, Methanocorpusculum			Euryarchaeota	Methanoculleus, Methanocaldococcus
	Crenarchaeota	Staphylothermus, Thermofilum,
rTCA cycle acl	Nitrospirae	Nitrospira	Nitrospirae	Nitrospira	Nitrospirae	Nitrospira
	Chlorobi	Chlorobium, Chlorobaculum, Pelodictyon, Chloroherpeton, Prosthecochloris,	Chlorobi	Chlorobium, Chlorobaculum, Pelodictyon	Chlorobi	Chlorobium, Chlorobaculum, Pelodictyon
	Aquificae	Sulfurihydrogenibium, Persephonella,	Aquificae	Persephonella, Sulfurihydrogenibium,
	Epsilonproteobacteria	Nitratiruptor Sulfurimonas	Epsilonproteobacteria	Sulfurimonas, Sulfurovum, Nautilia, Nitratiruptor,Sulfuricurvum	Epsilonproteobacteria	Sulfurimonas, Sulfurovum, Nitratiruptor
WL pathway cooSF, ascAB	Deltaproteobacteria	Syntrophobacter, Desulfococcus , Desulfatibacillum Desulfobacterium, Desulfarculus	Deltaproteobacteria	Syntrophobacter, Desulfococcus, Desulfatibacillum, Desulfobacterium, Desulfovibrio, Desulfarculus, Desulfurivibrio	Deltaproteobacteria	Syntrophobacter, Desulfococcus, Desulfatibacillum, Desulfobacterium, Desulfovibrio, Desulfarculus, Desulfurivibrio
	Firmicutes	Ammonifex, Carboxydothermus, Desulfitobacterium, Candidatus Desulforudis,Clostridium, Moorella, Thermosediminibacter, Alkaliphilus, Desulfotomaculum, Thermincola	Firmicutes	Ammonifex, Desulfitobacterium, Candidatus Desulforudis, Carboxydothermus, Moorella, Clostridium	Firmicutes	Ammonifex, Candidatus Desulforudis, Desulfitobacterium, Carboxydothermus, Alkaliphilus, Moorella, Clostridium, Desulfotomaculum, Thermosediminibacter
	Euryarchaeota	Methanosarcina, Methanosaeta, Thermococcus	Euryarchaeota	Methanosaeta, Methanosarcina	Euryarchaeota	Methanosarcina, Methanosaeta, Methanoregula, Ferroglobus
	Chloroflexi	Dehalococcoides, Dehalogenimonas	Chloroflexi	Dehalococcoides, Dehalogenimonas	Chloroflexi	Dehalococcoides, Dehalogenimonas
					Nitrospira	Thermodesulfovibrio
3-HP cycle prp, mcl	Gammaproteobacteria	Thioalkalivibrio, Methylococcus, Shewanella	Gammaproteobacteria	Thioalkalivibrio, Methylococcus, Shewanella, Vibrio, Marinobacter, Alkalilimnicola, Pseudomonas	Gammaproteobacteria	Methylococcus, Thioalkalivibrio, Shewanella, Vibrio, Pseudomonas
	Alphaproteobacteria	Ruegeria, Ruegeria, Rhodospirillum, Magnetospirillum, Methylobacterium, Caulobacter, Rhodopseudomonas, Roseobacter, Hyphomicrobium, Azospirillum, Rhodomicrobium, Brucella, Bradyrhizobium	Alphaproteobacteria	Ruegeria, Rhodospirillum, Magnetospirillum, Rhodobacter, Rhodopseudomonas, Parvibaculum, Methylobacterium, Paracoccus, Roseobacter, Dinoroseobacter, Azospirillum, Bradyrhizobium, Xanthobacter, Granulibacter, Brucella	Alphaproteobacteria	Rhodospirillum, Parvibaculum, Ruegeria, Magnetospirillum, Rhodopseudomonas, Methylobacterium, Rhodobacter, Bradyrhizobium, Azospirillum, Brucella, Mesorhizobium, Paracoccus, Roseobacter, Oligotropha, Xanthobacter, Dinoroseobacter, Sinorhizobium
	Betaproteobacteria	Ralstonia, Methylibium
	Deltaproteobacteria	Desulfatibacillum, Desulfococcus, Desulfarculus, Desulfobacterium	Deltaproteobacteria	Desulfarculus, Desulfobacterium, Desulfatibacillum, Desulfococcus	Deltaproteobacteria	Desulfobacterium, Desulfatibacillum, Desulfococcus, Desulfarculus
	Actinobacteria	Frankia, Mycobacterium, Nocardioides, Saccharopolyspora, Micromonospora	Actinobacteria	Mycobacterium, Frankia, Amycolatopsis, Saccharopolyspora, Nocardioides	Actinobacteria	Frankia, Mycobacterium, Amycolatopsis, Nocardioides, Conexibacter, Saccharopolyspora, Nakamurella
	Chlorobi	Chlorobium, Pelodictyon	Chlorobi	Chlorobium, Pelodictyon	Chlorobi	Chlorobium, Pelodictyon
	Chloroflexi	Chloroflexus, Roseiflexus

## Sheet: Table S9
Table S9. Taxonomy assignments of genes encoding key enzymes involved in sulfur cycle detected in metagenomes. Only taxa with >1% of the total hits are shown.
Pathway/genes	Phylum/Class	GTV1902	Phylum/Class	GTV1904	Phylum/Class	GTV1906
tst	Bacteroidetes	Salinibacter, Rhodothermus	Bacteroidetes	Salinibacter, Rhodothermus	Bacteroidetes	Salinibacter, Rhodothermus
	Euryarchaeota	Haloferax, Halobacterium, Haloquadratum, Haloarcula	Euryarchaeota	Haloferax, Methanohalophilus	Euryarchaeota	Haloferax, Methanohalophilus
	Deinococci	Deinococcus, Thermus,	Deinococci	Deinococcus, Thermus	Deinococci	Deinococcus, Meiothermus
	Chloroflexi	Roseiflexus, Chloroflexus, Thermomicrobium	Chloroflexi	Roseiflexus	Chloroflexi	Roseiflexus
	Firmicutes	Thermaerobacter	unclassified (derived from Bacteria)	Thermobaculum	unclassified (derived from Bacteria)	Thermobaculum
	Actinobacteria	Mycobacterium, Rubrobacter, Kineococcus, Rhodococcus	Actinobacteria	Mycobacterium, Rubrobacter	Actinobacteria	Mycobacterium, Rubrobacter, Saccharopolyspora, Streptomyces, Rhodococcus
	Gammaproteobacteria	Nitrosococcus, Alkalilimnicola	Gammaproteobacteria	Nitrosococcus, Pseudomonas, Alcanivorax, Azotobacter, Chromohalobacter, Halothiobacillus	Gammaproteobacteria	Nitrosococcus, Pseudomonas, Azotobacter
	Alphaproteobacteria	Sinorhizobium	Alphaproteobacteria	Ruegeria, Rhodobacter, Acidiphilium	Nitrospirae	Nitrospira
	Chlorobi		Chlorobi	Chlorobium	Crenarchaeota	Sulfolobus
			Thaumarchaeota	Nitrosopumilus, Cenarchaeum	Thaumarchaeota	Nitrosopumilus, Cenarchaeum
			Betaproteobacteria	Cupriavidus	unclassified (derived from Bacteria)	Thermobaculum
dsrAB	Gammaproteobacteria	Allochromatium, Thioalkalivibrio, Alkalilimnicola, unclassified (derived from Gammaproteobacteria), Halorhodospira	Gammaproteobacteria	Allochromatium, Thioalkalivibrio, Alkalilimnicola, unclassified (derived from Gammaproteobacteria), Halorhodospira	Gammaproteobacteria	Allochromatium, Thioalkalivibrio, Alkalilimnicola, unclassified (derived from Gammaproteobacteria), Halorhodospira
	Alphaproteobacteria	Rhodomicrobium, Magnetospirillum	Alphaproteobacteria	Rhodomicrobium, Magnetospirillum	Alphaproteobacteria	Rhodomicrobium, Magnetospirillum
	Betaproteobacteria	Thiobacillus, Sideroxydans	Betaproteobacteria	Thiobacillus, Sideroxydans	Betaproteobacteria	Thiobacillus, Sideroxydans
	Firmicutes	Carboxydothermus, Moorella
	Nitrospirae	Thermodesulfovibrio, Desulfitobacterium, Desulfotomaculum
	Deltaproteobacteria	Desulfovibrio, Desulfatibacillum, Desulfohalobium, Desulfotalea, Desulfarculus, Syntrophobacter
	Chlorobi	Chlorobium
apr	Firmicutes	Halothermothrix, Desulfotomaculum, Clostridium, Candidatus Desulforudis, Pelotomaculum, Ammonifex	Firmicutes	Desulfotomaculum	Firmicutes	Halothermothrix, Desulfotomaculum, Clostridium
	Betaproteobacteria	Thiobacillus	Betaproteobacteria	Thiobacillus, Sideroxydans	Betaproteobacteria	Thiobacillus, Sideroxydans
	Chlorobi	Chlorobaculum, Chlorobium, Pelodictyon			Chlorobi	Chlorobium, Chlorobaculum
	Deltaproteobacteria	Syntrophobacter, Desulfovibrio, Desulfatibacillum, Desulfarculus, Desulfobacterium, Desulfococcus, Desulfotalea	Deltaproteobacteria	Desulfotalea, Desulfurivibrio	Deltaproteobacteria	Syntrophobacter, Desulfovibrio
	Euryarchaeota	Archaeoglobus			Euryarchaeota	Archaeoglobus
	Nitrospirae	Thermodesulfovibrio
	Alphaproteobacteria	Candidatus Pelagibacter	Alphaproteobacteria	Candidatus Pelagibacter	Alphaproteobacteria	Candidatus Pelagibacter
	Gammaproteobacteria	unclassified (derived from Gammaproteobacteri), Thioalkalivibrio	Gammaproteobacteria	Thioalkalivibrio, Allochromatium, unclassified (derived from Gammaproteobacteri)	Gammaproteobacteria	unclassified (derived from Gammaproteobacteri), Thioalkalivibrio, Allochromatium
sat	Chloroflexi	Roseiflexus, Chloroflexus	Chloroflexi	Roseiflexus, Chloroflexus	Chloroflexi	Roseiflexus, Chloroflexus
	Alphaproteobacteria	Rhodobacter, Ruegeria, Dinoroseobacter, Jannaschia	Alphaproteobacteria	Ruegeria, Rhodobacter, Jannaschia, Dinoroseobacter, Roseobacter	Alphaproteobacteria	Ruegeria, Rhodobacter, Jannaschia, Roseobacter, Dinoroseobacter
	Bacteroidetes	Rhodothermus	Bacteroidetes	Rhodothermus	Bacteroidetes	Rhodothermus
	Firmicutes	Bacillus, Symbiobacterium, Candidatus Desulforudis, Staphylococcus	Firmicutes	Bacillus	Firmicutes	Bacillus
	Aquificae	Aquifex	Aquificae	Aquifex	Aquificae	Aquifex,
	Cyanobacteria	Synechococcus, Thermosynechococcus, Cyanothece			Cyanobacteria	Synechococcus
	Betaproteobacteria	Thiobacillus	Betaproteobacteria	Thiobacillus	Betaproteobacteria	Thiobacillus
	Actinobacteria	Rubrobacter
	unclassified (derived from Bacteria)	Thermobaculum			unclassified (derived from Bacteria)	Thermobaculum,
	Gammaproteobacteria	Thioalkalivibrio	Gammaproteobacteria	Thioalkalivibrio, Alcanivorax, Allochromatium, unclassified (derived from Gammaproteobacteria), Psychrobacter	Gammaproteobacteria	Thioalkalivibrio, Alcanivorax, Allochromatium, unclassified (derived from Gammaproteobacteria)
	Euryarchaeota	Pyrococcus, Ferroglobus			Thaumarchaeota	Nitrosopumilus
	Chlorobi	Chlorobium	Chlorobi	Chlorobium	Chlorobi	Chlorobium,
	Deltaproteobacteria	Syntrophobacter, Desulfatibacillum, Sorangium	Deltaproteobacteria	Desulfococcus, Desulfatibacillum, Desulfobacterium, Desulfarculus, Desulfotalea, Desulfovibrio, Syntrophobacter	Deltaproteobacteria	Desulfovibrio, Desulfatibacillum, Desulfarculus
			Planctomycetes	Planctomyces	Planctomycetes	Planctomyces
SoxABXYZ	Betaproteobacteria	Ralstonia, Thiobacillus, Burkholderia	Betaproteobacteria	Thiobacillus, Cupriavidus, Ralstonia, Burkholderia,	Betaproteobacteria	Thiobacillus, Burkholderia, Methylibium, Cupriavidus, Dechloromonas
	Alphaproteobacteria	Bradyrhizobium, Nitrobacter, Ruegeria, Acidiphilium, Dinoroseobacter, Methylobacterium, Roseovarius,Oligotropha, Sulfitobacter, Roseobacter, Rhodobacter	Alphaproteobacteria	Bradyrhizobium, Ruegeria, Roseobacter, Dinoroseobacter, Sulfitobacter, Roseobacter Rhodopseudomonas, Dinoroseobacter, Rhodobacter, Oligotropha, Acidiphilium,Nitrobacter	Alphaproteobacteria	Bradyrhizobium, Methylobacterium, Nitrobacter, Oligotropha, Acidiphilium, Rhodopseudomonas, Ruegeria, Roseovarius, Dinoroseobacter
	Chlorobi	Chlorobium, Chlorobaculum, Pelodictyon,	Chlorobi	Chlorobium, Chlorobaculum, Pelodictyon,	Chlorobi	Chlorobium, Chlorobaculum, Pelodictyon
	Gammaproteobacteria	Thiomicrospira, Thioalkalivibrio, unclassified (derived from Gammaproteobacteria),	Gammaproteobacteria	Thiomicrospira, unclassified (derived from Gammaproteobacteria), Thioalkalivibrio	Gammaproteobacteria	Thiomicrospira, Thioalkalivibrio, unclassified (derived from Gammaproteobacteria),Congregibacter
	Deltaproteobacteria	Anaeromyxobacter	Deltaproteobacteria	Anaeromyxobacter		Anaeromyxobacter

## Sheet: Table S10
Table S10. Taxonomy assignments of genes encoding key enzymes involved in nitrogen cycle detected in metagenomes. Only taxa with >1% of the total hits are shown.
Pathway/genes	Phylum/Class	GTV1902	Phylum/Class	GTV1904	Phylum/Class	GTV1906
napA	Gammaproteobacteria	Shewanella, Pseudomonas, Aeromonas, Saccharophagus, Colwellia, Shigella, Photobacterium	Gammaproteobacteria	Shewanella, Pseudomonas, Colwellia, Aeromonas, Vibrio, Psychromonas, Photobacterium	Gammaproteobacteria	Shewanella, Pseudomonas, Aeromonas, Colwellia, Vibrio, Edwardsiella, Yersinia, Psychromonas, Shigella, Hahella, Saccharophagus
	Bacteroidetes	Maribacter, Rhodothermus,	Bacteroidetes	Maribacter	Bacteroidetes	Maribacter
	Epsilonproteobacteria	Campylobacter, Helicobacter, Nitratiruptor, Nautilia, Wolinella	Epsilonproteobacteria	Campylobacter, Helicobacter, Nautilia, Wolinella, Nitratiruptor, Arcobacter, Sulfurovum, Sulfurimonas, Sulfuricurvum, Sulfurospirillum	Epsilonproteobacteria	Campylobacter, Helicobacter, Nitratiruptor, Nautilia, Sulfuricurvum
	Firmicutes	Symbiobacterium, Desulfitobacterium	Firmicutes		Firmicutes	Symbiobacterium, Persephonella
	Verrucomicrobia	Coraliomargarita,	Verrucomicrobia	Coraliomargarita	Verrucomicrobia	Coraliomargarita
	Betaproteobacteria	Dechloromonas Cupriavidus, Ralstonia, Azoarcus, Leptothrix, Bordetella	Betaproteobacteria	Dechloromonas, Azoarcus, Bordetella,	Betaproteobacteria	Azoarcus, Dechloromonas, Bordetella, Cupriavidus, Laribacter, Leptothrix
	Deltaproteobacteria	Geobacter, Anaeromyxobacter, Desulfovibrio, Sorangium	Deltaproteobacteria	Sorangium	Deltaproteobacteria	Geobacter, Anaeromyxobacter, Sorangium, Desulfovibrio
	Aquificae	Persephonella	Aquificae	Persephonella, Sulfurihydrogenibium,	Aquificae	Sulfurihydrogenibium
	unclassified (derived from Proteobacteria)	Magnetococcus	unclassified (derived from Proteobacteria)	Magnetococcus	unclassified (derived from Proteobacteria)	Magnetococcus
	Alphaproteobacteria	Rhodobacter, Rhodopseudomonas, Dinoroseobacter, Magnetospirillum, Sinorhizobium	Alphaproteobacteria	Dinoroseobacter, Rhodobacter, Bradyrhizobium, Magnetospirillum, Rhodopseudomonas	Alphaproteobacteria	Rhodobacter, Dinoroseobacter, Magnetospirillum, Rhodopseudomonas, Bradyrhizobium
narGH	Deltaproteobacteria	Desulfococcus, Geobacter, Anaeromyxobacter	Deltaproteobacteria	Geobacter, Anaeromyxobacter	Deltaproteobacteria	Geobacter, Anaeromyxobacter, Desulfococcus
	Euryarchaeota	Haloarcula, Haloferax, Halorubrum, Halogeometricum, Halomicrobium, Haloterrigena, Natronomonas	Euryarchaeota	Ferroglobus,	Euryarchaeota	Haloarcula, Natronomonas, Haloterrigena , Aeropyrum, Halorubrum
	Nitrospirae	Nitrospira	Nitrospirae	Nitrospira,	Nitrospirae	Nitrospira
	Betaproteobacteria	Dechloromonas, Alicycliphilus, Ralstonia,	Betaproteobacteria	Thiobacillus, Aromatoleum, Burkholderia,	Betaproteobacteria	Alicycliphilus
	Chrysiogenetes	Desulfurispirillum	Chrysiogenetes	Desulfurispirillum	Chrysiogenetes	Desulfurispirillum
	Alphaproteobacteria	Nitrobacter	Alphaproteobacteria	Nitrobacter, Roseobacter, Maricaulis, Paracoccus, Methylobacterium	Alphaproteobacteria	Nitrobacter
	Gammaproteobacteria	unclassified (derived from Gammaproteobacteria)	Gammaproteobacteria	unclassified (derived from Gammaproteobacteria), Shewanella	Gammaproteobacteria	unclassified (derived from Gammaproteobacteria)
	Aquificae	Hydrogenobacter, Persephonella,	Aquificae		Aquificae	Hydrogenobacter
	Deinococcus-Thermus	Meiothermus, Oceanithermus	Deinococcus-Thermus	Meiothermus, Oceanithermus	Deinococcus-Thermus	Meiothermus, Oceanithermus
	Epsilonproteobacteria	Nitratiruptor	Epsilonproteobacteria		Epsilonproteobacteria
			Firmicutes	Bacillus	Firmicutes	Bacillus,
					Deferribacteres	Denitrovibrio
nirKS	Alphaproteobacteria	Hyphomicrobium, Roseobacter, Dinoroseobacter, Paracoccus	Alphaproteobacteria	Roseobacter, Rhodopseudomonas, Dinoroseobacter	Alphaproteobacteria	Paracoccus, Magnetospirillum, Rhodopseudomonas, Bradyrhizobium
	Betaproteobacteria	Cupriavidus, Chromobacterium, Thiobacillus, Neisseria, Nitrosomonas, Dechloromonas, Aromatoleum, Polaromonas	Betaproteobacteria	Thiobacillus, Cupriavidus, Bordetella, Aromatoleum, Ralstonia	Betaproteobacteria	Cupriavidus, Thiobacillus, Aromatoleum, Acidovorax, Dechloromonas, Neisseria
	Gammaproteobacteria	Marinobacter, Nitrosococcus, Colwellia, Pseudomonas, Nitrosomonas, Unclassified (derived from Gammaproteobacteria), Moraxella	Gammaproteobacteria	Colwellia, Marinobacter, Pseudomonas, Hahella, Kangiella	Gammaproteobacteria	Colwellia, Marinobacter, Pseudomonas, Hahella, Nitrosococcus, Kangiella, Shewanella, unclassified (derived from Gammaproteobacteria), Pseudoalteromonas
	Chloroflexi	Sphaerobacter, Chloroflexus,			Chloroflexi	Chloroflexus
	Bacteroidetes	Flavobacterium	Bacteroidetes	Maribacter, Flavobacterium	Bacteroidetes	Flavobacterium, Maribacter
	Firmicutes	Thermincola, Symbiobacterium, Bacillus, Alkaliphilus, Thermosediminibacter	Epsilonproteobacteria	Sulfurimonas	Firmicutes	Symbiobacterium
	Deltaproteobacteria	Bdellovibrio			Deltaproteobacteria	Bdellovibrio
	unclassified (derived from Bacteria)	Thermobaculum
	Aquificae	Hydrogenobaculum			Aquificae	Hydrogenobaculum
	Spirochaetes	Leptospira			Spirochaetes	Leptospira
norBC	Alphaproteobacteria	Hyphomicrobium, Roseobacter, Dinoroseobacter, Paracoccus	Alphaproteobacteria	Roseobacter, Rhodopseudomonas, Dinoroseobacter	Alphaproteobacteria	Roseobacter, Paracoccus, Magnetospirillum, Rhodopseudomonas, Bradyrhizobium
	Betaproteobacteria	Ralstonia, Cupriavidus, Chromobacterium, Thiobacillus, Neisseria, Nitrosomonas, Dechloromonas, Aromatoleum, Polaromonas	Betaproteobacteria	Thiobacillus, Cupriavidus, Bordetella, Aromatoleum, Ralstonia	Betaproteobacteria	Cupriavidus, Thiobacillus, Aromatoleum, Acidovorax, Dechloromonas, Neisseria
	Gammaproteobacteria	Marinobacter, Nitrosococcus, Colwellia, Pseudomonas, Hahella, unclassified (derived from Gammaproteobacteria), Moraxella	Gammaproteobacteria	Colwellia, Marinobacter, Pseudomonas, Hahella, Kangiella	Gammaproteobacteria	Colwellia, Marinobacter, Pseudomonas, Hahella, Nitrosococcus, Kangiella, Shewanella, unclassified (derived from Gammaproteobacteria), Pseudoalteromonas
	Chloroflexi	Sphaerobacter, Chloroflexus			Chloroflexi	Chloroflexus
	Bacteroidetes	Flavobacterium	Bacteroidetes	Maribacter, Flavobacterium	Bacteroidetes	Flavobacterium, Maribacter
	Firmicutes	Thermincola, Symbiobacterium, Bacillus, Alkaliphilus, Thermosediminibacter	Epsilonproteobacteriairmicutes	Sulfurimonas	Firmicutes	Leptospira
	Deltaproteobacteria	Bdellovibrio			Deltaproteobacteria	Bdellovibrio
	unclassified (derived from Bacteria)	Thermobaculum
	Aquificae	Hydrogenobaculum			Aquificae	Hydrogenobaculum
	Spirochaetes	Leptospira			Spirochaetes	Leptospira
nosZ	Bacteroidetes	Rhodothermus, Salinibacter, Gramella,	Bacteroidetes	Gramella, Maribacter, Rhodothermus, Dechloromonas, Robiginitalea, Marivirga	Bacteroidetes	Rhodothermus, Gramella, Maribacter, Robiginitalea
	Chloroflexi	Sphaerobacter, Thermomicrobium	Chloroflexi	Sphaerobacter, Thermomicrobium	Chloroflexi	Sphaerobacter, Thermomicrobium,
	Deltaproteobacteria	Anaeromyxobacter	Deltaproteobacteria		Deltaproteobacteria	Anaeromyxobacter
	Betaproteobacteria	Dechloromonas, Ralstonia	Betaproteobacteria	Candidatus Accumulibacter	Betaproteobacteria	Dechloromonas, Candidatus Accumulibacter,
	Epsilonproteobacteria	Campylobacter, Sulfurimonas, Nitratiruptor	Epsilonproteobacteria	Campylobacter, Nitratiruptor, Sulfurimonas, Sulfurovum	Epsilonproteobacteria	Campylobacter, Sulfurimonas, Sulfurovum, Nitratiruptor
	Alphaproteobacteria	Magnetospirillum	Alphaproteobacteria	Roseobacter, Magnetospirillum, Ruegeria, Rhodobacter, Paracoccus, Bradyrhizobium, Rhodospirillum	Alphaproteobacteria	Magnetospirillum
	Archaea	Pyrobaculum, Ferroglobus	Archaea	Pyrobaculum	Archaea	Pyrobaculum, Ferroglobus
	Verrucomicrobia	Opitutus	Aquificae	Hydrogenobacter , Persephonella	Aquificae	Hydrogenobacter, Persephonella
	Firmicutes	Desulfitobacterium	Gemmatimonadetes	Gemmatimonas
			Gammaproteobacteria	Shewanella
nirBD	Betaproteobacteria	Ralstonia, Cupriavidus, Sideroxydans, Thiobacillus, Dechloromonas, Burkholderia, Aromatoleum, Candidatus Accumulibacter	Betaproteobacteria	Sideroxydans, Cupriavidus, Polynucleobacter, Burkholderia, Thiobacillus, Aromatoleum, Ralstonia, Methylovorus, Acidovorax, Dechloromonas	Betaproteobacteria	Sideroxydans, Thiobacillus, Cupriavidus, Burkholderia, Dechloromonas, Polynucleobacter, Aromatoleum, Polaromonas, Ralstonia, Albidiferax, Herminiimonas
	Gammaproteobacteria	Methylococcus, Thioalkalivibrio, Alkalilimnicola, Hahella, Pseudomonas, Halothiobacillus	Gammaproteobacteria	Methylococcus, Thioalkalivibrio, Pseudomonas, Alkalilimnicola, Halothiobacillus, Hahella,	Gammaproteobacteria	Methylococcus, Thioalkalivibrio, Alkalilimnicola, Pseudomonas, Hahella, Halothiobacillus
	Firmicutes	Bacillus, Geobacillus	Firmicutes	Bacillus	Firmicutes	Bacillus,
	Alphaproteobacteria	Caulobacter, Novosphingobium, Magnetospirillum	Alphaproteobacteria	Novosphingobium, Caulobacter, Nitrobacter, Sphingopyxis, Azospirillum, Magnetospirillum	Alphaproteobacteria	Novosphingobium, Caulobacter, Sphingopyxis, Nitrobacter, Magnetospirillum, Azospirillum
	Deltaproteobacteria	Desulfohalobium, Desulfarculus	Deltaproteobacteria		Planctomycetes	Pirellula
	Bacteroidetes	Cytophaga
nrfA	Deltaproteobacteria	Anaeromyxobacter, Myxococcus, Sorangium, Bdellovibrio, Desulfotalea, Pelobacter, Syntrophus	Deltaproteobacteria	Pelobacter, Geobacter, Desulfotalea, Syntrophobacter, Desulfovibrio, Myxococcus, Sorangium	Deltaproteobacteria	Pelobacter, Anaeromyxobacter, Sorangium, Myxococcus, Bdellovibrio, Geobacter
	Firmicutes	Carboxydothermus, Desulfitobacterium, Symbiobacterium, Ammonifex, Syntrophomonas	Firmicutes		Firmicutes
	Deinococcus-Thermus	Meiothermus,	Deinococcus-Thermus		Deinococcus-Thermus	Meiothermus
	Verrucomicrobia	Coraliomargarita, Opitutus,	Verrucomicrobia	Coraliomargarita	Verrucomicrobia	Coraliomargarita, Opitutus
	Bacteroidetes	Parabacteroides, Porphyromonas, Riemerella	Bacteroidetes	Bacteroides, Parabacteroides, Marivirga, Riemerella,	Bacteroidetes	Parabacteroides, Riemerella, Bacteroides
			Gammaproteobacteria	Shewanella, Aeromonas, Photobacterium	Gammaproteobacteria	Photobacterium
			Planctomycetes	Rhodopirellula	Planctomycetes	Rhodopirellula
			Epsilonproteobacteria	Wolinella, Sulfurospirillum, Arcobacter	Actinobacteria	Corynebacterium
			Nitrospirae	Thermodesulfovibrio
N2 fixation nifDHK	Archaea	Methanosarcina, Methanococcus, Methanothermobacter, Methanocaldococcus			Archaea	Methanosarcina, Methanococcus, Methanoculleus, Methanothermus, Methanoregula
	Chloroflexi	Roseiflexus, Dehalococcoides	Chloroflexi	Dehalococcoides	Chloroflexi	Roseiflexus, Dehalococcoides,
	Firmicutes	Caldicellulosiruptor, Clostridium, Desulfitobacterium, Desulfotomaculum, Alkaliphilus, Thermincola, Heliobacterium, Thermoanaerobacterium, Candidatus Desulforudis	Firmicutes	Clostridium	Firmicutes	Clostridium, unclassified (derived from Clostridiales), Caldicellulosiruptor, Heliobacterium
	Chlorobi	Chlorobium, Chlorobaculum, Pelodictyon	Chlorobi	Chlorobium, Chlorobaculum, Pelodictyon	Gammaproteobacteria	Methylococcus
	Deltaproteobacteria	Syntrophobacter, Desulfovibrio, Desulfatibacillum, Geobacter,	Deltaproteobacteria	Desulfurivibrio, Desulfomicrobium, Desulfovibrio, Syntrophobacter, Geobacter, Desulfatibacillum, Pelobacter, Desulfarculus	Deltaproteobacteria	Desulfovibrio, Desulfomicrobium, Geobacter, Anaeromyxobacter
	Cyanobacteria	Cyanothece, Anabaena, Nostoc, Synechococcus	Cyanobacteria	Cyanothece	Cyanobacteria	Nostoc, Anabaena, Cyanothece, Synechococcus
	Nitrospirae	Thermodesulfovibrio	Verrucomicrobia	Coraliomargarita	Nitrospirae	Thermodesulfovibrio
	Actinobacteria	Frankia			Actinobacteria	Frankia
	Fusobacteria	Ilyobacter			Betaproteobacteria	Burkholderia
	Alphaproteobacteria	Rhodopseudomonas			Alphaproteobacteria	Rhodopseudomonas, Rhodospirillum
					Chrysiogenetes	Desulfurispirillum
Nitrification amoABC	Betaproteobacteria	Nitrosomonas, Nitrosospira	Betaproteobacteria	Nitrosomonas, Nitrosospira	Betaproteobacteria	, Nitrosospira
hao	Deltaproteobacteria	Anaeromyxobacter, Desulfovibrio, Desulfatibacillum , Syntrophobacter, Desulfarculus, Desulfohalobium, Desulfobacterium	Deltaproteobacteria	Anaeromyxobacter,, Desulfovibrio, Desulfarculus, Desulfatibacillum, Desulfobacterium, Desulfococcus, Desulfohalobium	Deltaproteobacteria	Anaeromyxobacter,, Desulfovibrio, Desulfarculus, Desulfatibacillum, Desulfobacterium, Syntrophobacter
	Archaea	Methanococcoides	Archaea	Methanococcoides	Archaea	Methanococcoides
	Epsilonproteobacteria	Campylobacter	Epsilonproteobacteria	Campylobacter	Epsilonproteobacteria	Campylobacter
			Gammaproteobacteria	Methylococcus
			Betaproteobacteria	Nitrosospira, Nitrosomonas	Betaproteobacteria	Nitrosospira, Nitrosomonas

## Sheet: Table S11
Table S11. Taxonomy assignments of genes encoding key enzymes involved in aerobic respiration detected in metagenomes. Only taxa with >1% of the total hits are shown.
Pathway/genes	Phylum/Class	GTV1902	Phylum/Class	GTV1904	Phylum/Class	GTV1906
coxABCD	Chloroflexi	Roseiflexus, Sphaerobacter, Thermomicrobium	Chloroflexi	Chloroflexus	Chloroflexi	Chloroflexus
	Cyanobacteria	Gloeobacter, Synechococcus, Synechocystis, Cyanothece	Bacteroidetes	Rhodothermus
	Planctomycetes	Planctomyces, Pirellula	Planctomycetes	Pirellula, Planctomyces
	Betaproteobacteria	Burkholderia, Ralstonia, Candidatus Accumulibacter	Betaproteobacteria	Cupriavidus	Betaproteobacteria	Cupriavidus
	Alphaproteobacteria	Magnetospirillum, Sinorhizobium			Alphaproteobacteria	Sinorhizobium
	Firmicutes	Thermaerobacter, Symbiobacterium, Bacillus	Firmicutes	Thermaerobacter	Firmicutes	Bacillus
	Deltaproteobacteria	Geobacter, Desulfovibrio			Deltaproteobacteria	Geobacter
	Gemmatimonadetes	Gemmatimonas			Gemmatimonadetes	Gemmatimonas
	Gammaproteobacteria	Pseudomonas	Gammaproteobacteria	Colwellia, unclassified (derived from Gammaproteobacteria), Pseudoalteromonas	Gammaproteobacteria	Methylococcus
	Acidobacteria	Candidatus Solibacter
	Verrucomicrobia	Opitutus, Methylacidiphilum
	Aquificae	Hydrogenobacter
	Actinobacteria	Conexibacter
	Euryarchaeota	Halobacterium, Halorhabdus, Natronomonas
ccoNOPQ	Betaproteobacteria	Ralstonia, Sideroxydans, Rhodospirillum, Aromatoleum, Methylobacillus, Albidiferax, Thiobacillus, Polaromonas, Chromobacterium,	Betaproteobacteria	Thiobacillus, Aromatoleum, Janthinobacterium, Dechloromonas, Cupriavidus, Methylobacillus, Methylotenera, Sideroxydans, Neisseria, Laribacter, Ralstonia, Chromobacterium,	Betaproteobacteria	Thiobacillus, Sideroxydans, Methylobacillus, Aromatoleum, Janthinobacterium, Cupriavidus, Ralstonia, Chromobacterium, Methylibium, Bordetella, Candidatus Accumulibacter, Laribacter, Thauera
	Alphaproteobacteria	Rhodospirillum, Rhodospirillum, Rhodopseudomonas, Parvibaculum Rhodobacter
	Bacteroidetes	Salinibacter, Flavobacterium	Bacteroidetes	Cytophaga, Gramella, Flavobacterium, Spirosoma, Leadbetterella, Pedobacter, Chitinophaga, Zunongwangia, Dyadobacter	Bacteroidetes	Flavobacterium, Cytophaga, Gramella, Leadbetterella, Bordetella,
	Gammaproteobacteria	Pseudomonas, Thioalkalivibrio, Shewanella, Pseudoalteromonas,	Gammaproteobacteria	Thioalkalivibrio, Pseudomonas, Shewanella, Pseudoalteromonas, Vibrio, Alkalilimnicola	Gammaproteobacteria	Thioalkalivibrio, Pseudomonas, Shewanella, Vibrio, Pseudoalteromonas, Alkalilimnicola
	Firmicutes	Symbiobacterium
	Acidobacteria	Candidatus Solibacter
	Deltaproteobacteria	Desulfobacterium, Geobacter, Myxococcus,	Deltaproteobacteria	Myxococcus, Bdellovibrio	Deltaproteobacteria	Bdellovibrio, Myxococcus
	Planctomycetes	Pirellula	Planctomycetes	Rhodopirellula
	Aquificae	Sulfurihydrogenibium

[truncated: 2 more sheets: Table S12, Table S13]
